1 bioRxiv

2 **Article Type:** Research article.

3 **Article Title:** Phylogenetic study of thermophilic genera *Anoxybacillus*, *Geobacillus*,  
4 *Parageobacillus*, and proposal of a new classification *Quasigeobacillus*  
5 gen. nov.

6 **Authors:** Talamantes-Becerra, Berenice<sup>1-2\*</sup>; Carling, Jason<sup>2</sup>; Blom, Jochen<sup>3</sup>;  
7 Georges, Arthur<sup>1</sup>

8 **Affiliation:** <sup>1</sup>Institute for Applied Ecology, University of Canberra ACT 2601  
9 Australia.

10 <sup>2</sup>Diversity Arrays Technology Pty Ltd, Bruce, Canberra ACT 2617  
11 Australia.

12 <sup>3</sup>Bioinformatics & Systems Biology, Justus-Liebig-University Giessen,  
13 35392 Glessen, Hesse, Germany

14 **\*Correspondence:** Berenice Talamantes Becerra, Institute for Applied Ecology,  
15 University of Canberra ACT 2601 Australia. Email:  
16 [Berenice.TalamantesBecerra@canberra.edu.au](mailto:Berenice.TalamantesBecerra@canberra.edu.au)

17 **Running head:** Phylogenetic study of thermophilic bacteria.

18 **Word Count:** Abstract: 178 Main body: 3709 References: n= 60

19

20

21

22

23 **Abstract**

24 A phylogenetic study of *Anoxybacillus*, *Geobacillus* and *Parageobacillus* was performed using  
25 publicly available whole genome sequences. A total of 113 genomes were selected for  
26 phylogenomic metrics including calculation of Average Nucleotide Identity (ANI) and  
27 Average Amino acid Identity (AAI), and a maximum likelihood tree was built from alignment  
28 of a set of 662 orthologous core genes. The combined results from the core gene tree and ANI  
29 and AAI dendrograms show that the genomes split into two main clades, clade I containing all  
30 *Geobacillus*, all *Parageobacillus* and some species of *Anoxybacillus*, and clade II, containing  
31 the majority of *Anoxybacillus* species. Clade I is further partitioned into three clades, consisting  
32 separately of *Geobacillus*, *Parageobacillus*, and a third clade which we suggest should be  
33 elevated to a new genus *Quasigeobacillus* gen. nov. Two species of *Anoxybacillus* showed  
34 inconsistent positioning among the trees produced by differing methods and could not be  
35 clearly resolved into any of the three existing genera or the new genus. This research shows  
36 the importance of considering closely related genera together when studying phylogeny or  
37 assigning genomic affinities.

38 **Keywords**

39 Thermophile; *Geobacillus*; *Anoxybacillus*; *Parageobacillus*

40 **Abbreviations**

41 ANI, Average Nucleotide Identity; AAI, Average Amino acid Identity; DDH, DNA-DNA  
42 hybridization; CDS, Coding Sequence.

43

44

## 45 **Introduction**

46 Next-generation sequencing technologies produce massive amounts of information that allows  
47 researchers to discriminate among data to establish thresholds for bacterial taxonomical scales  
48 [1]. In recent decades, the use of DNA-DNA hybridization was considered as the “gold  
49 standard” for bacterial taxonomy. Alternatively, 16S rRNA gene sequencing has provided a  
50 different approach; however, its low-resolution results in high sequence similarities amongst  
51 bacterial genera and species, limiting its’ usefulness for classification [2]. As an alternative to  
52 the use of 16S rRNA gene sequencing for assessing bacterial populations, the average  
53 nucleotide identity (ANI) values provide a higher resolution to detect relatedness among  
54 bacterial genomes. It is calculated by comparing two closely related genome sequences and  
55 estimating the percentage identity of aligned nucleotides using the BLAST search program [3].  
56 If comparisons are done between distant genomes, it is recommended to use the average amino  
57 acid identity (AAI), as amino acid similarity is better conserved in homologous protein  
58 sequences than DNA sequence similarity [4, 5]. The use of bioinformatic tools to calculate  
59 ANI by itself is not sufficient, as alignment of a set of orthologous core genes may provide a  
60 better view of the vertical phylogenetic relationship. Taxonomic affiliation of new genomes  
61 should be verified using average nucleotide identity and multilocus phylogenetic analysis [6].

62       The genera *Anoxybacillus*, *Geobacillus* and *Parageobacillus* belong to the family  
63 *Bacillaceae*. They are moderate thermophiles with the ability to form spores, allowing them to  
64 survive in a dormant state for years, depending on the environmental conditions of the host soil  
65 such as pH, water availability, organic matter or calcium. *Anoxybacillus* species have been  
66 isolated mainly from geothermal sources; however, they are also found as a food contaminant  
67 or in compost. *Geobacillus* species, have been isolated from hot springs, oilfields, spoiled  
68 canned food, desert sand, composts, water, ocean sediments, sugar beet juice and mud [7].

69 Similarly, *Parageobacillus* is a thermophilic facultative anaerobe, which has been isolated  
70 from geothermal springs environments and compost [8].

71 *Anoxybacillus* is a Gram-positive, spore-forming rods whose main fatty acid present in  
72 the membrane of is iso-C15:0, and has a reported range in genomic GC content 42–57 mol%  
73 [9]. *Anoxybacillus* was proposed in the year 2000 as a new genus within the family *Bacillaceae*,  
74 based on a strain isolated from animal manure. The anaerobic growth characteristics observed  
75 in this strain were reflected in the chosen generic name *Anoxybacillus*. The new strain, which  
76 was given the full name *Anoxybacillus pushchinensis*, was found to cluster together with the  
77 previously described *Bacillus flavothermus*, with both of these species being distinct from other  
78 *Bacillus* species. *Bacillus flavothermus* was then reclassified as *Anoxybacillus flavithermus*  
79 giving the new genus two species [10]. Over the subsequent years, numerous species and  
80 strains have been added to the genus *Anoxybacillus*, many of which have been found to be  
81 either aerobes or facultatively anaerobic [11, 12]. There are twenty-four species and subspecies  
82 belonging to genus *Anoxybacillus* validly described to date. The following thirteen have  
83 genome assemblies available: *A. amylolyticus* [13], *A. ayderensis* [14], *A. flavithermus* [10,  
84 15], *A. flavithermus* subsp. *Yunnanensis* [16], *A. geothermalis* [17], *A. gonensis* [18], *A.*  
85 *kamchatkensis* [19], *A. mongoliensis* [20], *A. pushchinoensis* [10], *A. suryakundensis* [21], *A.*  
86 *tepidamans* [22], *A. thermarum* [23], *A. vitaminiphilus* [24]. The remaining eleven do not have  
87 genome assemblies available: *A. bogrovensis* [25], *A. caldiproteolyticus* [26, 27], *A.*  
88 *contaminans* [28], *A. eryuanensis* [29], *A. kamchatkensis* subsp. *Asaccharedens* [30], *A.*  
89 *kaynarcensis* [31], *A. kestanbolensis* [14], *A. rupiensis* [32], *A. salavatliensis* [33], *A.*  
90 *tengchongensis* [29] and *A. voinovskiensis* [34].

91 *Geobacillus* is a Gram-positive spore-forming thermophile, whose dominant cellular  
92 membrane fatty acids are iso-C15:0, iso-C16:0 and iso-C17:0, with a reported genomic GC  
93 content ranging between 48.2–58 mol% [9]. *Geobacillus* was also originally classified within

94 the genus *Bacillus*. A taxonomic study of thermophilic *bacilli* in 2001 resulted in the splitting  
95 of a group from the genus *Bacillus* into the newly described genus *Geobacillus*, containing  
96 eight species, consisting of the two newly described species *Geobacillus subterraneus* and  
97 *Geobacillus uzenensis*, as well as the members previously belonging to *Bacillus* group 5: *G.*  
98 *stearotherophilus*, *G. thermoleovorans*, *G. thermocatenulatus*, *G. kaustophilus*, *G.*  
99 *thermoglucosidasius* and *G. thermodenitrificans* [35]. The species *G. thermoglucosidasius* was  
100 subsequently removed from the genus [36]. *Geobacillus* currently contains sixteen validly  
101 described species all of which have genome assemblies available. The remaining *Geobacillus*  
102 species described with a valid bacteriological code are: *G. icigianus* [37], *G. jurassicus* [38],  
103 *G. lituanicus* [39], *G. thermantarcticus* [27], *G. vulcani* [40], *G. genomospecies 3* [36, 41], and  
104 *G. proteiniphilus* [42]. A genome sequence is available in Genbank with a species name of *G.*  
105 *zalihae* [43]; however, the name has not been validly published [9].

106 In 2016, the new genus *Parageobacillus* was defined by reassigning a clade from  
107 *Geobacillus*, integrating five species into this genus [36]: *P. caldodoxylosilyticus* [44], *P.*  
108 *thermoglucosidasius* [27, 35, 45], *P. thermantarcticus* [27, 46], *P. toebii* [27, 47], *P.*  
109 *genomospecies 1* [36]. The taxonomic revision was based on placement of the clade within a  
110 core gene phylogenetic tree of *Geobacillus* species, GC content differences and ANI [36]. A  
111 partial phylogenetic analysis of *G. galactosidasius* by Ramaloko et al. [48], came to conclusion  
112 that *G. galactosidasius* should properly belong to *Parageobacillus*. Najar and Thakur [49]  
113 proposed the formal reclassification of *G. galactosidasius* to *P. galactosidasius* and *G.*  
114 *yumthangensis* to *P. yumthangensis*. The data from the present study agrees with this  
115 conclusion and we are following this reclassification for the taxonomy used in this study.

116 Here we report a phylogenetic analysis and comparative genomic analysis of the closely  
117 related thermophilic genera *Anoxybacillus*, *Geobacillus* and *Parageobacillus*, as well as  
118 determining the preliminary placement of 7 newly isolated strains of these genera [50]. The

119 study was performed using 113 genome assemblies of *Anoxybacillus*, *Geobacillus* and  
120 *Parageobacillus* available on RefSeq database [51].

121

## 122 **Materials and methods**

123 Methods followed in this paper were based on those used for reassessment of the genus  
124 *Geobacillus* by Aliyu et al. [36]. Specifically, a set of core genes was identified from the group  
125 of bacterial genomes under study, followed by construction of a maximum likelihood tree. The  
126 same set of genomes was used to calculate ANI and AAI scores, followed by construction of  
127 UPGMA dendrograms. GC content and genome size for all genomes were calculated. The  
128 topology of the trees, GC contents and ANI values were used for taxonomic delimitation [36].

### 129 ***Geobacillus* and *Anoxybacillus* genomes**

130 Complete genome assemblies from the RefSeq database [51] were downloaded for thirty-two  
131 *Anoxybacillus* strains and seventy-three *Geobacillus* strains. The genus *Parageobacillus* was  
132 represented in the analysis by the genome assemblies of the seven validly described  
133 *Parageobacillus* species, with one representative assembly per species. Additionally, whole  
134 genome sequences of two *Anoxybacillus*, four *Geobacillus* and one *Parageobacillus* strains  
135 obtained from a study of thermophiles in Australia [50] were included. This group contained  
136 31 chromosome level assemblies, 33 scaffold genomes and 49 genomes up to the contig level.  
137 Anomalous genome assemblies listed with suppressed RefSeq status, including those identified  
138 as chimeric, contaminated, or frameshifted were excluded from the study.

### 139 ***Phylogenetic analysis***

140 The *Anoxybacillus*, *Geobacillus*, *Parageobacillus* core genome was identified using EDGAR  
141 2.0 [52]. The genome assembly of *Geobacillus thermodenitrificans* NG80-2 was used as a

142 starting reference, from which all CDS were identified and iteratively compared against the set  
143 of selected *Anoxybacillus*, *Geobacillus* and *Parageobacillus* genome assemblies to identify  
144 orthologous genes via BLAST. This process results in the identification of a core genome  
145 consisting of the full set of CDS from the starting reference assembly, for which orthologs can  
146 be identified amongst all other assemblies [53]. The genome assembly of *Bacillus subtilis*  
147 *spizizenii* TU-B-10T [54] was included in the core gene analysis as an outgroup. The  
148 assemblies included are listed in **Supplementary Table S1**. During the core gene discovery  
149 process, five assemblies with relatively low numbers of CDS were excluded after they were  
150 found to significantly reduce the number of core genes recognised, and one was removed as it  
151 was an exact duplicate of another *Anoxybacillus Suryakundensis* strain. The assemblies  
152 removed are listed in **Supplementary Table S2**. The obtained CDS were concatenated and  
153 aligned using MUSCLE [55]. The alignments were used to build a maximum-likelihood tree  
154 with the software package FastTree [56, 57].

### 155 *Phylogenomic metric calculations*

156 ANI and AAI values were calculated between all pairs of genomes to build ANI and AAI  
157 similarity matrices. Default parameters were selected to calculate two-way ANI using the ani.rb  
158 script; similarly, two-way AAI was calculated using the aai.rb script. Draft genomes were  
159 concatenated with 100 N bases introduced between contigs. Both Ruby scripts are publicly  
160 available in the enveomics package [5]. Similarity values obtained by ANI and AAI were  
161 arranged into similarity matrices and used as input in the DendroUPGMA [58] web server by  
162 selecting the unweighted pair group with arithmetic mean clustering method (UPGMA) to  
163 obtain dendrograms. Trees were plotted with the web-based tool Interactive Tree Of Life [59].

### 164 *Identifying genes unique to clade I-c*

165 Genes unique to clade I-c were identified using BLASTn [60] alignment. To find the genes  
166 unique to clade I-C, CDS of clade I-c were used for BLASTn alignment against all the  
167 assemblies in the NCBI RefSeq database [51] and NCBI nt database. The relaxed BLASTn  
168 filtering criteria used were percentage identity 30%, bitscore 10 and percentage overlap of 1%.  
169 The CDS used for alignment were from the assembly *Anoxybacillus tepidamans* PS2, a  
170 member of clade I-c. Those CDS which were found to be present in all members of clade I-c  
171 and no members of clade I-a, clade I-b and clade II were considered as unique to clade I-c.

172

## 173 **Results**

174 A total of thirty-two *Anoxybacillus*, seventy-three *Geobacillus*, eight *Parageobacillus* and one  
175 *Bacillus* genomes (**Supplementary Table S1**) produced a core gene set of 662 orthologous  
176 genes per genome, which was used to produce a maximum likelihood phylogenetic tree with  
177 114 genomes.

178 The core gene maximum likelihood tree splits into three major groups consisting of the  
179 outgroup, clade I and clade II (**Figure 1**). Clade I consists of eighty-seven genomes, from  
180 *Geobacillus* and *Parageobacillus* plus a subset of *Anoxybacillus* genomes. Clade II contains  
181 twenty-four of the remainder *Anoxybacillus* genomes. Within clade I, the first branch separates  
182 *A. vitaminiphilus* from all other assemblies. The next branch splits the remaining *Anoxybacillus*  
183 with the exception of *A. flavithermus* B4168 from all *Geobacillus* and *Parageobacillus*. Clade  
184 I has been divided into *A. vitaminiphilus* plus three subclades, I-a, I-b and I-c.

185 Clade I-a includes sixty-eight *Geobacillus* genomes from the species, *G. genomosp* 3,  
186 *G. icigianus*, *G. jurassicus*, *G. kaustophilus*, *G. lituanicus*, *G. stearothermophilus*, *G.*  
187 *subterraneus*, *G. thermocatenulatus*, *G. thermodenitrificans*, *G. thermoleovorans*, *G.*



188 *uzenensis*, *G. vulcani*, *G. zalihae*, *G. proteiniphilus* and twenty-two unnamed *Geobacillus*  
189 species. Some species are represented by multiple genome assemblies.

190 Clade I-b contains fourteen genomes, from which seven representative species belong  
191 to *Parageobacillus* genomes including the species *P. genomosp 1*, *P. caldoxylosilyticus*, *P.*  
192 *thermantarcticus*, *P. thermoglucosidasius*, *P. toebii*, *P. galactosidasius*, *P. yumthangensis*.  
193 Five are unnamed *Geobacillus* and one unnamed *Parageobacillus* species. Additionally, the  
194 assembly named *A. flavithermus* B4168 is located within this clade.

195 Clade I-c has five genomes, from which one has been defined as *A. tepidamans*, and  
196 four are *unnamed Anoxybacillus* species.

197 Clade II consists of twenty-four *Anoxybacillus* genomes, including the species *A.*  
198 *flavithermus*, *A. pushchinoensis*, *A. gonensis*, *A. kamchatkensis*, *A. thermarum*, *A. ayderensis*,  
199 *A. mongoliensis*, *A. suryakundensis* and three *unnamed Anoxybacillus* species. Some species  
200 are represented by multiple genome assemblies.

201 The two-way ANI values calculated between all genome pairs were used to build a  
202 UPGMA [58] dendrogram with 114 genomes (**Figure 2**). The clades from the maximum  
203 likelihood core gene tree are shown alongside for comparison. The first branch splits the  
204 outgroup from all other samples. The positions of *A. amylolyticus* and *A. vitaminiphilus* differ  
205 from the placement from the core gene maximum likelihood tree. The second branch splits *A.*  
206 *amylolyticus* from all other *Anoxybacillus*, *Geobacillus* and *Parageobacillus*, while *A.*  
207 *vitaminiphilus* is present within the clade of *Parageobacillus* (clade I-b). The ANI values  
208 calculated are shown in a similarity matrix in **Supplementary Table S3**.

209 The two-way average AAI values calculated between all genome pairs were used to  
210 build a UPGMA [58] dendrogram with 114 genomes (**Figure 3**). The clades from the maximum

211 likelihood core gene tree are shown alongside for comparison. Positioning is broadly similar  
212 to the trees in **Figure 1** and **Figure 2**. The primary distinction is the position of *A. amylolyticus*,  
213 and *A. vitaminiphilus* which are located in clade I-c within the subclade containing the other  
214 *Anoxybacillus* species. The AAI values calculated are shown in a similarity matrix in  
215 **Supplementary Table S4**.

216 Genome size and GC content for each of the genomes is listed in **Supplementary Table**  
217 **S1**. A graphical representation of these values is shown alongside the core gene maximum  
218 likelihood tree in **Figure 1**.

219 The genome size of clade I-a contained mostly *Geobacillus* genomes ranges from 2.63  
220 to 4.69 Mb and the GC content ranged from 48.79 to 55.27%.

221 Clade I-b, including *Parageobacillus* genomes, had genome sizes ranging from 3.22 to  
222 3.95 Mb and GC content from 41.60 to 44.60%.

223 The clade I-c which includes a subset of *Anoxybacillus* genomes, showed genome sizes  
224 ranging between 3.36 to 3.87 Mb, and GC content ranging from 42.50 to 43.00%.

225 Clade II which includes the majority of *Anoxybacillus* genomes had a genome size  
226 range from 2.56 to 2.86 Mb and a GC content ranging from 41.10 to 42.70%.

### 227 **Affinities of seven newly sequenced genomes**

228 The placement of the seven genomes derived from the study of thermophilic bacteria in  
229 Australia [50] was determined on the basis of their relative position within the core gene  
230 maximum likelihood tree and the ANI and AAI values. These genomes had genome sizes  
231 ranging between 2.73 to 4.69 Mb, a minimum GC content of 41.81% and a maximum of  
232 55.27%. ANI and AAI values to their closest reference genomes, for the samples *Geobacillus*  
233 sp. BMUD, *Geobacillus* sp. MR, and *Parageobacillus* sp. NFOSA3 are above 99.17 and 98.39

234 respectively. Genomes of *Anoxybacillus* sp. EFIL, *Geobacillus* sp. MMMUD3 and *Geobacillus*  
235 sp. DSP4a have ANI of 97.99, 97.14 and 97.64 respectively. The genome of *Anoxybacillus* sp.  
236 CHMUD had the most distant ANI value with 95.03 and AAI of 95.81. Results are shown in  
237 **Table 3**.

### 238 **Genes unique to clade I-c**

239 A total of 6 CDS were found to be unique to clade I-c. Names, descriptions and products of  
240 CDS are shown in **Table 4**, and DNA sequences for each CDS are shown in **Table 5**.

241 **Table 6** shows the BLASTn alignment results of these CDS against all members of clade I-c  
242 showing that the 6 genes are present in all members of the clade. **Table 7** shows the best hit  
243 from the BLASTn results to genomes not present in clade I-c. In all cases, the best hit outside  
244 of clade I-c is a genome assembly distant from *Anoxybacillus*, *Geobacillus* and  
245 *Parageobacillus*. The percentage identity and the percentage alignment overlap of the best hit  
246 to assemblies outside of clade I-c are presented in the table. For these 6 genes, the closest  
247 genomes outside of clade I-c were *Bacillus methanolicus*, *Bacillus* sp., *Polaribacter* sp.,  
248 *Paenibacillus* sp., *Bacillus alveayuensis* and *Mesobacillus jeotgali*.

249

### 250 **Discussion**

251 In this paper, we have found that the current taxonomic delimitations of the genera  
252 *Anoxybacillus*, *Geobacillus* and *Parageobacillus* does not represent accurately the  
253 phylogenetic relationships within this group.

### 254 **Assessment of clade I-c**

255 In the core gene maximum likelihood tree, clade I, which contains the genera *Geobacillus* and  
256 *Parageobacillus* in subclades (clade I-a and clade I-b respectively), also contained a third clade  
257 (clade I-c) which consisted of genomes ascribed to the genus *Anoxybacillus*. Two further  
258 *Anoxybacillus* species present within clade I, *A. vitaminiphilus* and *A. amylolyticus*, exhibited  
259 incongruous placement when the core gene tree was compared with the UPGMA dendrograms  
260 derived from ANI and AAI similarity matrices of all taxa. The affinities of these two species  
261 were difficult to determine from the current evidence and are considered as unresolved taxa.  
262 The other *Anoxybacillus* genomes present within clade I-c, excluding the two species with  
263 incongruous placement, were *A. tepidamans*, *Anoxybacillus* sp. B2M1, *Anoxybacillus* sp.  
264 B7M1, *Anoxybacillus* sp. P3H1B and *Anoxybacillus* sp. UARK 01. These genomes were  
265 located within clade I-c in each of the three phylogenetic trees, forming a grouping which was  
266 consistently distinct from *Geobacillus* (clade I-a) and *Parageobacillus* (clade I-b). Internally,  
267 this grouping consisted of two further divisions, with *A. tepidamans* on the one hand, and the  
268 remaining four genomes which are closely placed on all of the trees, having ANI values ranging  
269 from 98.5 – 99.11% and AAI values ranging from 98.13 – 99.98%. These four genomes can  
270 be considered to represent a single genomospecies. The minimum ANI and AAI values from  
271 *A. tepidamans* to the members of the genomospecies is 79.48% and 81.72% respectively. The  
272 members of clade I-c are therefore considered to consist of two species, *A. tepidamans* and one  
273 genomospecies. Due to the consistent separation of the two species in clade I-c from  
274 *Geobacillus*, *Parageobacillus*, and the other members of *Anoxybacillus* in clade II, we consider  
275 that the evidence suggests a fourth, new genus is required to accommodate these two species.  
276 The average ANI and AAI values separating the candidate new genus from the members of the  
277 existing three genera are shown in **Table 1**. The mean ANI and AAI values suggest that the  
278 candidate new genus is somewhat more closely related to *Parageobacillus*, followed by  
279 *Anoxybacillus* and *Geobacillus* in descending order. The evidence from genome size and GC

280 content also suggests a closer affinity to *Parageobacillus* (**Table 2**). The structure of the three  
281 phylogenetic trees reaffirms the distinctiveness of the two species consistently present in clade  
282 I-c with respect to the three existing genera. An alternative approach may be to merge these  
283 two species with *Parageobacillus*; however, if this course of action was followed, the evidence  
284 from the phylogenetic trees would also support the need for *Parageobacillus* to be merged  
285 again with *Geobacillus*. Considering the evidence of the core gene maximum likelihood tree,  
286 ANI and AAI UPGMA dendrograms and similarity values, we suggest that *A. tepidamans* and  
287 the one genomospecies present in clade I-c should be placed into a new genus called  
288 *Quasigeobacillus*. Due to the incongruous positioning of *A. vitaminiphilus* and *A. amylolyticus*  
289 the affinities of these two species remains unresolved at this point.

### 290 **Genes unique to clade I-c**

291 The core gene maximum likelihood tree, ANI and AAI similarity matrices indicate that clade  
292 I-c is distinct from clade I-a and clade I-b. To assess the potential presence of distinct genes  
293 within clade I-c, a BLASTn alignment of all CDS from clade I-c was performed. CDS which  
294 were found to be present in all members of clade I-c and no members of clade I-a, clade I-b  
295 and clade II, on the basis of the BLAST alignments were selected. This analysis revealed 6  
296 genes unique to clade I-c. In all cases, when the 6 CDS were aligned using BLASTn against  
297 the NCBI RefSeq database, the nearest matching assemblies excluding clade I-c were all from  
298 taxa distinct from *Anoxybacillus*, *Geobacillus* and *Parageobacillus*. The origin of these 6  
299 genes in clade I-c may derive from a horizontal gene transfer to the basal ancestor of clade I-c.

### 300 **Assessment of *Parageobacillus***

301 Clade I-b contains inconsistent naming at the genus level. Six of the genomes that have been  
302 assigned to *Geobacillus* and *Anoxybacillus* have been found to belong to *Parageobacillus* in  
303 clade I-b. These genomes have not been named to species level or validly described. The list

304 includes one genome named as *A. flavithermus* strain B4168 and five *Geobacillus* genomes,  
305 including *Geobacillus* sp. 44B, *Geobacillus* sp. Y41MC1, *Geobacillus* sp. WCH70,  
306 *Geobacillus* sp. LYN3 and *Geobacillus* sp. 44C. The genome named *A. flavithermus* strain  
307 B4168 is incorrectly assigned at the genus and species level.

308

## 309 **Conclusions**

310 The process of identifying and naming isolates after whole-genome sequencing is usually based  
311 on an approach in which the closest genome is identified using multiple methods for alignment  
312 of nucleotide or protein sequences and the distance from the nearest genome then determines  
313 whether the strain is a new species or belong to an existing species. Although phylogenetic  
314 assessment has been recognised as an essential step in this process, the breadth of species  
315 assessed together requires further consideration. A combined phylogenomic analysis of the  
316 genera *Geobacillus*, *Parageobacillus* and *Anoxybacillus* has revealed problems in the  
317 delimitation of these genera, which would not be revealed if each were considered alone. In  
318 the context of determining affinities of a new genome, it is essential to consider closely related  
319 species together for construction of a phylogeny. When this process occurs in the absence of a  
320 broader phylogenetic assessment, the genus designation for new strains can become  
321 incongruent with the phylogeny of the underlying complete set of available genomes. For  
322 example, the genomes belonging to clade I-c have been previously assigned to the genus  
323 *Anoxybacillus*, and in one case, previously assigned to *Geobacillus*, however, when the two  
324 genera are considered together in a phylogenetic analysis, clade I-c is seen to be outside of  
325 *Anoxybacillus* and *Geobacillus*.

326

327 **Proposed taxonomic changes**

328 Description of *Quasigeobacillus* gen. nov.

329 *Quasigeobacillus* (Qua.si.ge.o.ba.cil'lus. L. adv. *quasi* almost like; N.L. masc. n *Geobacillus*  
330 a bacterial genus; N.L. masc. n. *Quasigeobacillus*, similar to *Geobacillus*)

331 The genomes in clade I-c form a distinct group based on genome characteristics and  
332 can be separated from *Anoxybacillus*, *Geobacillus* and *Parageobacillus* on this basis. The  
333 position of this clade in relation to the other species is shown in **Figure 2** and **Figure 3**, the  
334 ANI and AAI similarity values are shown as a heatmap in **Figure 4** and the full data set for this  
335 heatmap is included in the **Supplementary Table S5**. The genome size of this clade ranges  
336 from 3.16 to 3.87 Mb and has a GC content ranging from 42.50 to 43.63 %. Therefore, we  
337 propose a new genus consisting of *Q. tepidamans*.

338 The type species is *Quasigeobacillus tepidamans*.

339

340 Description of *Quasigeobacillus tepidamans* comb. nov.

341 Etymology *tepidamans*: te.pid.a'mans. L. masc. adj. *tepidus* moderately warm, lukewarm; L.  
342 pres. part. *amans* loving; N.L. part. adj. *tepidamans* loving warm (conditions).

343 Basonym: *Anoxybacillus tepidamans* Schäffer et al. 2004; *Anoxybacillus tepidamans* Coorevits  
344 et al. 2012.

345 The description for *Quasigeobacillus tepidamans* comb. nov. follows that of  
346 *Geobacillus tepidamans* [22], *Anoxybacillus tepidamans* Coorevits et al. [27] and the genus  
347 *Quasigeobacillus*.

348 The type strain is *Quasigeobacillus tepidamans*.

349 This is available in two culture collections deposits. The American Type Culture  
350 Collection ATCC® BAA-942 and Leibniz Institute DSMZ-German Collection of  
351 Microorganisms and Cell Cultures GmbH DSM No: 16325, Type Strain, Designation GS5-97,  
352 R-35643.

353

#### 354 **Availability of data and materials**

355 The data supporting our findings are contained within the manuscript and supplementary  
356 materials.

357

#### 358 **Author contributions**

359 **Berenice Talamantes-Becerra:** Conceptualization, project administration, Methodology,  
360 Data curation, visualization, Formal Analysis, Writing-Original draft preparation and Editing.

361 **Jason Carling:** Conceptualization, Methodology, Visualization, Formal Analysis, Validation,  
362 Writing-Original draft preparation and Editing. **Jochen Blom:** Software. **Arthur Georges:**  
363 Conceptualization, Resources, Writing-Reviewing and Editing.

364

#### 365 **Conflicts of interest**

366 Authors declare no conflict of interest. The funding body had no role in study design, sample  
367 collection, analysis, interpretation of data, writing the manuscript, and decision to publish.

368



369 **Funding information**

370 BTB was awarded a PhD scholarship from Consejo Nacional de Ciencia y Tecnología  
371 ‘CONACYT - Becas CONACYT al extranjero 2015’ programme.

372

373 **Ethical approval**

374 Not applicable.

375

376 **Consent for publication**

377 Not applicable.

378

379 **Acknowledgements**

380 BTB would like to acknowledge Josefina Talamantes-Becerra, Angel Medina and Colash.

381

382 **References**

- 383 1. **Schloss PD, Westcott SL.** Assessing and improving methods used in operational  
384 taxonomic unit-based approaches for 16S rRNA gene sequence analysis. *Appl Environ*  
385 *Microbiol* 2011;77:3219–3226. doi:10.1128/AEM.02810-10.
- 386 2. **Janda JM, Abbott SL.** 16S rRNA gene sequencing for bacterial identification in the  
387 diagnostic laboratory: pluses, perils, and pitfalls. *J Clin Microbiol* 2007;45:2761–2764.  
388 doi:10.1128/JCM.01228-07.

- 389 3. **Yoon S-H, Ha S-M, Lim J, Kwon S, Chun J.** A large-scale evaluation of algorithms  
390 to calculate average nucleotide identity. *Antonie Van Leeuwenhoek* 2017;110:1281–  
391 1286. doi:10.1007/s10482-017-0844-4.
- 392 4. **Rodriguez-R LM, Konstantinidis KT.** Bypassing cultivation to identify bacterial  
393 species. *Microbe* 2014;9:111–118.
- 394 5. **Rodriguez-R LM, Konstantinidis KT.** The enveomics collection: a toolbox for  
395 specialized analyses of microbial genomes and metagenomes. *PeerJ Prepr*  
396 2016;4:e1900v1. doi:10.7287/peerj.preprints.1900v1.
- 397 6. **Figueras MJ, Beaz-Hidalgo R, Hossain MJ, Liles MR.** Taxonomic affiliation of new  
398 genomes should be verified using average nucleotide identity and multilocus  
399 phylogenetic analysis. *Genome Announc*;2. Epub ahead of print December 2014. DOI:  
400 10.1128/genomeA.00927-14. doi:10.1128/genomeA.00927-14.
- 401 7. **Mandic-Mulec I, Stefanic P, van Elsas JD.** Ecology of Bacillaceae. *Microbiol Spectr*  
402 2015;3:1–24. doi:10.1128/microbiolspec.TBS-0017-2013.
- 403 8. **Mohr T, Aliyu H, Kuchlin R, Polliack S, Zwick M, et al.** CO-dependent hydrogen  
404 production by the facultative anaerobe *Parageobacillus thermoglucosidasius*. *Microb*  
405 *Cell Fact* 2018;17:1–12. doi:10.1186/s12934-018-0954-3.
- 406 9. **Minana-Galbis D, Pinzon DL, Loren JG, Manresa A, Oliart-Ros RM.**  
407 Reclassification of *Geobacillus pallidus* (Scholz et al. 1988) Banat et al. 2004 as  
408 *Aeribacillus pallidus* gen. nov., comb. nov. *Int J Syst Evol Microbiol* 2010;60:1600–  
409 1604. doi:10.1099/ijs.0.003699-0.
- 410 10. **Pikuta E, Lysenko A, Chuvilskaya N, Mendrock U, Hippe H, et al.** *Anoxybacillus*  
411 *pushchinensis* gen. nov., sp. nov., a novel anaerobic, alkaliphilic, moderately

- 412 thermophilic bacterium from manure, and description of *Anoxybacillus flavitherms*  
413 comb. nov. *Int J Syst Evol Microbiol* 2000;50 Pt 6:2109–2117. doi:10.1099/00207713-  
414 50-6-2109.
- 415 11. **Goh KM, Kahar UM, Chai YY, Chong CS, Chai KP, et al.** Recent discoveries and  
416 applications of *Anoxybacillus*. *Appl Microbiol Biotechnol* 2013;97:1475–1488.  
417 doi:10.1007/s00253-012-4663-2.
- 418 12. **Goh KM, Gan HM, Chan K-G, Chan GF, Shahar S, et al.** Analysis of *Anoxybacillus*  
419 Genomes from the Aspects of Lifestyle Adaptations, Prophage Diversity, and  
420 Carbohydrate Metabolism. *PLoS One* 2014;9:e90549.  
421 doi:10.1371/journal.pone.0090549.
- 422 13. **Poli A, Esposito E, Lama L, Orlando P, Nicolaus G, et al.** *Anoxybacillus amylolyticus*  
423 sp. nov., a thermophilic amylase producing bacterium isolated from Mount Rittmann  
424 (Antarctica). *Syst Appl Microbiol* 2006;29:300–307. doi:10.1016/j.syapm.2005.10.003.
- 425 14. **Dulger S, Demirbag Z, Belduz AO.** *Anoxybacillus ayderensis* sp. nov. and  
426 *Anoxybacillus kestanbolensis* sp. nov. *Int J Syst Evol Microbiol* 2004;54:1499–1503.  
427 doi:10.1099/ijs.0.02863-0.
- 428 15. **Heinen W, Lauwers AM, Mulders JWM.** *Bacillus flavothermus*, a newly isolated  
429 facultative thermophile. *Antonie Van Leeuwenhoek* 1982;48:265–272.  
430 doi:10.1007/BF00400386.
- 431 16. **Dai J, Liu Y, Lei Y, Gao Y, Han F, et al.** A new subspecies of *Anoxybacillus*  
432 *flavithermus* ssp. *yunnanensis* ssp. nov. with very high ethanol tolerance. *FEMS*  
433 *Microbiol Lett* 2011;320:72–78. doi:10.1111/j.1574-6968.2011.02294.x.
- 434 17. **Filippidou S, Jaussi M, Junier T, Wunderlin T, Jeanneret N, et al.** *Anoxybacillus*

- 435 *geothermalis* sp. nov., a facultatively anaerobic, endospore-forming bacterium isolated  
436 from mineral deposits in a geothermal station. *Int J Syst Evol Microbiol* 2016;66:2944–  
437 2951. doi:10.1099/ijsem.0.001125.
- 438 18. **Belduz AO, Dulger S, Demirbag Z.** *Anoxybacillus gonensis* sp. nov., a moderately  
439 thermophilic, xylose-utilizing, endospore-forming bacterium. *Int J Syst Evol Microbiol*  
440 2003;53:1315–1320. doi:10.1099/ijms.0.02473-0.
- 441 19. **Kevbrin V V, Zengler K, Lysenko AM, Wiegel J.** *Anoxybacillus kamchatkensis* sp.  
442 nov., a novel thermophilic facultative aerobic bacterium with a broad pH optimum from  
443 the Geysir valley, Kamchatka. *Extremophiles* 2005;9:391–398. doi:10.1007/s00792-  
444 005-0479-7.
- 445 20. **Namsaraev ZB, Babasanova OB, Dunaevsky YE, Akimov VN, Barkhutova DD, et**  
446 **al.** *Anoxybacillus mongoliensis* sp. nov., a novel thermophilic proteinase producing  
447 bacterium isolated from alkaline hot spring, Central Mongolia. *Microbiology*  
448 2010;79:491–499. doi:10.1134/S0026261710040119.
- 449 21. **Deep K, Poddar A, Das SK.** *Anoxybacillus suryakundensis* sp. nov, a moderately  
450 thermophilic, alkalitolerant bacterium isolated from hot spring at Jharkhand, India. *PLoS*  
451 *One* 2013;8:e85493. doi:10.1371/journal.pone.0085493.
- 452 22. **Schaffer C, Franck WL, Scheberl A, Kosma P, McDermott TR, et al.** Classification  
453 of isolates from locations in Austria and Yellowstone National Park as *Geobacillus*  
454 *tepidamans* sp. nov. *Int J Syst Evol Microbiol* 2004;54:2361–2368.  
455 doi:10.1099/ijms.0.63227-0.
- 456 23. **Poli A, Romano I, Cordella P, Orlando P, Nicolaus B, et al.** *Anoxybacillus thermarum*  
457 sp. nov., a novel thermophilic bacterium isolated from thermal mud in Euganean hot

- 458            springs, Abano Terme, Italy. *Extremophiles* 2009;13:867–874. doi:10.1007/s00792-  
459            009-0274-y.
- 460    24.    **Zhang X-Q, Zhang Z-L, Wu N, Zhu X-F, Wu M.** *Anoxybacillus vitaminiphilus* sp.  
461            nov., a strictly aerobic and moderately thermophilic bacterium isolated from a hot  
462            spring. *Int J Syst Evol Microbiol* 2013;63:4064–4071. doi:10.1099/ijs.0.050096-0.
- 463    25.    **Atanassova M, Dereкова A, Mandeva R, Sjöholm C, Kambourova M.**  
464            *Anoxybacillus bogrovensis* sp. nov., a novel thermophilic bacterium isolated from a hot  
465            spring in Dolni Bogrov, Bulgaria. *Int J Syst Evol Microbiol* 2008;58:2359–2362.  
466            doi:10.1099/ijs.0.65745-0.
- 467    26.    **Chen X-G, Stabnikova O, Tay J-H, Wang J-Y, Tay ST-L.** Thermoactive extracellular  
468            proteases of *Geobacillus caldoproteolyticus*, sp. nov., from sewage sludge.  
469            *Extremophiles* 2004;8:489–498. doi:10.1007/s00792-004-0412-5.
- 470    27.    **Coorevits A, Dinsdale AE, Halket G, Lebbe L, De Vos P, et al.** Taxonomic revision  
471            of the genus *Geobacillus*: emendation of *Geobacillus*, *G. stearothermophilus*, *G.*  
472            *jurassicus*, *G. toebii*, *G. thermodenitrificans* and *G. thermoglucosidans* (nom. corrig.,  
473            formerly '*thermoglucosidasius*'); transfer of *Bacillus thermantarcticus*. *Int J Syst Evol*  
474            *Microbiol* 2012;62:1470–1485. doi:10.1099/ijs.0.030346-0.
- 475    28.    **De Clerck E, Rodriguez-Diaz M, Vanhoutte T, Heyrman J, Logan NA, et al.**  
476            *Anoxybacillus contaminans* sp. nov. and *Bacillus gelatini* sp. nov., isolated from  
477            contaminated gelatin batches. *Int J Syst Evol Microbiol* 2004;54:941–946.  
478            doi:10.1099/ijs.0.02960-0.
- 479    29.    **Zhang C-M, Huang X-W, Pan W-Z, Zhang J, Wei K-B, et al.** *Anoxybacillus*  
480            *tengchongensis* sp. nov. and *Anoxybacillus eryuanensis* sp. nov., facultatively anaerobic,

- 481 alkalitolerant bacteria from hot springs. *Int J Syst Evol Microbiol* 2011;61:118–122.  
482 doi:10.1099/ijs.0.020834-0.
- 483 30. **Gul-Guven R, Guven K, Poli A, Nicolaus B.** *Anoxybacillus kamchatkensis* subsp.  
484 *asaccharedens* subsp. nov., a thermophilic bacterium isolated from a hot spring in  
485 Batman. *J Gen Appl Microbiol* 2008;54:327–334. doi:10.2323/jgam.54.327.
- 486 31. **Inan K, Belduz AO, Canakci S.** *Anoxybacillus kaynarcensis* sp. nov., a moderately  
487 thermophilic, xylanase producing bacterium. *J Basic Microbiol* 2013;53:410–419.  
488 doi:10.1002/jobm.201100638.
- 489 32. **Derekova A, Sjøholm C, Mandeva R, Kambourova M.** *Anoxybacillus rupiensis* sp.  
490 nov., a novel thermophilic bacterium isolated from Rupi basin (Bulgaria). *Extremophiles*  
491 2007;11:577–583. doi:10.1007/s00792-007-0071-4.
- 492 33. **Cihan AC, Ozcan B, Cokmus C.** *Anoxybacillus salavatliensis* sp. nov., an  $\alpha$ -  
493 glucosidase producing, thermophilic bacterium isolated from Salavatli, Turkey. *J Basic*  
494 *Microbiol* 2011;51:136–146. doi:10.1002/jobm.201000115.
- 495 34. **Yumoto I, Hirota K, Kawahara T, Nodasaka Y, Okuyama H, et al.** *Anoxybacillus*  
496 *voinovskiensis* sp. nov., a moderately thermophilic bacterium from a hot spring in  
497 Kamchatka. *Int J Syst Evol Microbiol* 2004;54:1239–1242. doi:10.1099/ijs.0.02889-0.
- 498 35. **Nazina TN, Tourova TP, Poltarau AB, Novikova E V, Grigoryan AA, et al.**  
499 Taxonomic study of aerobic thermophilic bacilli: descriptions of *Geobacillus*  
500 *subterraneus* gen. nov., sp. nov. and *Geobacillus uzenensis* sp. nov. from petroleum  
501 reservoirs and transfer of *Bacillus stearothermophilus*, *Bacillus thermocatenuatus*,  
502 *Bacillus thermoleovorans*, *Bacillus kaustophilus*, *Bacillus thermodenitrificans* to  
503 *Geobacillus* as the new combinations *G. stearothermophilus*, *G. th..* *Int J Syst Evol*

- 504 *Microbiol* 2001;51:433–446. doi:10.1099/00207713-51-2-433.
- 505 36. **Aliyu H, Lebre P, Blom J, Cowan D, De Maayer P.** Phylogenomic re-assessment of  
506 the thermophilic genus *Geobacillus*. *Syst Appl Microbiol* 2016;39:527–533.  
507 doi:10.1016/j.syapm.2016.09.004.
- 508 37. **Bryanskaya A V, Rozanov AS, Slynko NM, Shekhovtsov S V, Peltek SE.**  
509 *Geobacillus icigianus* sp. nov., a thermophilic bacterium isolated from a hot spring. *Int*  
510 *J Syst Evol Microbiol* 2015;65:864–869. doi:10.1099/ijs.0.000029.
- 511 38. **Nazina TN, Sokolova DS, Grigoryan AA, Shestakova NM, Mikhailova EM, et al.**  
512 *Geobacillus jurassicus* sp. nov., a new thermophilic bacterium isolated from a high-  
513 temperature petroleum reservoir, and the validation of the *Geobacillus* species. *Syst Appl*  
514 *Microbiol* 2005;28:43–53.
- 515 39. **Kuisiene N, Raugalas J, Chitavichius D.** *Geobacillus lituanicus* sp. nov. *Int J Syst Evol*  
516 *Microbiol* 2004;54:1991–1995. doi:10.1099/ijs.0.02976-0.
- 517 40. **Nazina TN, Lebedeva E V, Poltaraus AB, Tourova TP, Grigoryan AA, et al.**  
518 *Geobacillus gargensis* sp. nov., a novel thermophile from a hot spring, and the  
519 reclassification of *Bacillus vulcani* as *Geobacillus vulcani* comb. nov. *Int J Syst Evol*  
520 *Microbiol* 2004;54:2019–2024. doi:10.1099/ijs.0.02932-0.
- 521 41. **Shintani M, Ohtsubo Y, Fukuda K, Hosoyama A, Ohji S, et al.** Complete Genome  
522 Sequence of the Thermophilic Polychlorinated Biphenyl Degradar *Geobacillus* sp.  
523 Strain JF8 (NBRC 109937). *Genome Announc* 2014;2:e01213-13.  
524 doi:10.1128/genomeA.01213-13.
- 525 42. **Semenova EM, Sokolova DS, Grouzdev DS, Poltaraus AB, Vinokurova NG, et al.**  
526 *Geobacillus proteiniphilus* sp. nov., a thermophilic bacterium isolated from a high-

- 527 temperature heavy oil reservoir in China. *Int J Syst Evol Microbiol* 2019;69:3001–3008.  
528 doi:10.1099/ijsem.0.003486.
- 529 43. **Abd Rahman RNZR, Leow TC, Salleh AB, Basri M.** *Geobacillus zalihae* sp. nov., a  
530 thermophilic lipolytic bacterium isolated from palm oil mill effluent in Malaysia. *BMC*  
531 *Microbiol*;7. Epub ahead of print 2007. doi: 10.1186/1471-2180-7-77.
- 532 44. **Fortina MG, Mora D, Schumann P, Parini C, Manachini PL, et al.** Reclassification  
533 of *Saccharococcus caldxylosilyticus* as *Geobacillus caldxylosilyticus* (Ahmad et al.  
534 2000) comb. nov. *Int J Syst Evol Microbiol* 2001;51:2063–2071. doi:10.1099/00207713-  
535 51-6-2063.
- 536 45. **Suzuki Y, Kishigami T, Inoue K, Mizoguchi Y, Eto N, et al.** *Bacillus*  
537 *thermoglucoasidarius* sp. nov., a new species of obligately thermophilic Bacilli. *Syst Appl*  
538 *Microbiol* 1983;4:487–495. doi:10.1016/S0723-2020(83)80006-X.
- 539 46. **Nicolaus B, Lama L, Esposito E, Manca MC, di Prisco G, et al.** “*Bacillus*  
540 *thermoantarcticus*” sp. nov., from Mount Melbourne, Antarctica: a novel thermophilic  
541 species. *Polar Biol* 1996;16:101–104. doi:10.1007/s003000050034.
- 542 47. **Sung MH, Kim H, Bae JW, Rhee SK, Jeon CO, et al.** *Geobacillus toebii* sp. nov., a  
543 novel thermophilic bacterium isolated from hay compost. *Int J Syst Evol Microbiol*  
544 2002;52:2251–2255. doi:10.1099/00207713-52-6-2251.
- 545 48. **Ramaloko WT, Koen N, Polliack S, Aliyu H, Lebre PH, et al.** High quality draft  
546 genomes of the type strains *Geobacillus thermocatenuatus* DSM 730(T), *G. uzenensis*  
547 DSM 23175(T) and *Parageobacillus galactosidasius* DSM 18751(T). *J genomics*  
548 2018;6:20–23. doi:10.7150/jgen.22986.
- 549 49. **Najar IN, Thakur N.** A systematic review of the genera *Geobacillus* and



- 550 *Parageobacillus*: their evolution, current taxonomic status and major applications.  
551 *Microbiology* 2020;166:800–816. doi: 10.1099/mic.0.000945.
- 552 50. **Talamantes-Becerra B, Carling J, Kilian A, Georges A.** Discovery of thermophilic  
553 *Bacillales* using reduced-representation genotyping for identification. *BMC Microbiol*  
554 2020;20:114. doi:10.1186/s12866-020-01800-z.
- 555 51. **O’Leary NA, Wright MW, Brister JR, Ciufu S, Haddad D, et al.** Reference sequence  
556 (RefSeq) database at NCBI: current status, taxonomic expansion, and functional  
557 annotation. *Nucleic Acids Res* 2016;44:D733-45. doi:10.1093/nar/gkv1189.
- 558 52. **Blom J, Kreis J, Spänig S, Juhre T, Bertelli C, et al.** EDGAR 2.0: an enhanced  
559 software platform for comparative gene content analyses. *Nucleic Acids Res*  
560 2016;44:W22–W28. doi:10.1093/nar/gkw255.
- 561 53. **Blom J.** *Comparative genomics on gene and single nucleotide level*. PhD Thesis,  
562 Technische Fakultät, Computational Genomics, Center for Biotechnology, Bielefeld  
563 University, Bielefeld, Germany; 2013.
- 564 54. **Earl AM, Eppinger M, Florian Fricke W, Rosovitz MJ, Rasko DA, et al.** Whole-  
565 genome sequences of *Bacillus subtilis* and close relatives. *J Bacteriol* 2012;194:2378–  
566 2379. doi:10.1128/JB.05675-11.
- 567 55. **Edgar RC.** MUSCLE: multiple sequence alignment with high accuracy and high  
568 throughput. *Nucleic Acids Res* 2004;32:1792–1797. doi:10.1093/nar/gkh340.
- 569 56. **Price MN, Dehal PS, Arkin AP.** FastTree: computing large minimum evolution trees  
570 with profiles instead of a distance matrix. *Mol Biol Evol* 2009;26:1641–1650.  
571 doi:10.1093/molbev/msp077.

- 572 57. **Price MN, Dehal PS, Arkin AP.** FastTree 2 – approximately maximum-likelihood trees  
573 for large alignments. *PLoS One* 2010;5:e9490. doi:10.1371/journal.pone.0009490.
- 574 58. **Romeu A, Palau J, Garcia-Vallvé S.** Horizontal gene transfer in glycosyl hydrolases  
575 inferred from codon usage in *Escherichia coli* and *Bacillus subtilis*. *Mol Biol Evol*  
576 1999;16:1125–1134. doi:10.1093/oxfordjournals.molbev.a026203.
- 577 59. **Letunic I, Bork P.** Interactive tree of life (iTOL) v3: an online tool for the display and  
578 annotation of phylogenetic and other trees. *Nucleic Acids Res* 2013;44:W242–W245.  
579 doi:10.1093/nar/gkw290.
- 580 60. **Altschul SF, Gish W, Miller W, Myers EW, Lipman DJ.** Basic local alignment search  
581 tool. *J Mol Biol* 1990;215:403–410. doi:10.1016/S0022-2836(05)80360-2.

582

583

584

585

586

587

588

589

590

591

592

593

594

595

596 **Table 1.** Phylogenomic metrics comparing the average nucleotide identity mean values and average amino acid identity mean values of  
597 candidate new genus assigned into clade I-c against the members of the existing three genera.

598

| Phylogenomic metrics                 | Clade I-c versus       |                      |                    |
|--------------------------------------|------------------------|----------------------|--------------------|
|                                      | <i>Parageobacillus</i> | <i>Anoxybacillus</i> | <i>Geobacillus</i> |
| Average nucleotide identity (mean %) | 77.40                  | 77.90                | 76.54              |
| Average amino acid identity (mean %) | 75.27                  | 70.73                | 70.30              |

599

600

601

602

603

604

605

606

607

608

609 **Table 2.** Statistics comparing minimum, maximum and mean values of genome size and GC content per clade.

610

| Statistics               | Clades                    |                               |                                |                            |
|--------------------------|---------------------------|-------------------------------|--------------------------------|----------------------------|
|                          | I-a<br><i>Geobacillus</i> | I-b<br><i>Parageobacillus</i> | I-c<br><i>Quasigeobacillus</i> | II<br><i>Anoxybacillus</i> |
| Genome size (min Mb)     | 2.63                      | 3.32                          | 3.16                           | 3.36                       |
| Genome size (max Mb)     | 4.69                      | 3.95                          | 3.87                           | 3.87                       |
| Genome size (average Mb) | 3.66                      | 3.64                          | 3.61                           | 3.62                       |
| GC content (min %)       | 48.79                     | 41.60                         | 42.50                          | 42.50                      |
| GC content (max %)       | 55.27                     | 44.60                         | 43.63                          | 43.00                      |
| GC content (average %)   | 52.03                     | 43.10                         | 42.77                          | 42.75                      |

611

612

613

614

615

616

617

618

619

620

621 **Table 3.** Placement of seven newly sequenced genomes from the study of thermophilic bacteria in Australia.

622

| New placement                     |           |       | Closest match                                 |           |       |       |       |
|-----------------------------------|-----------|-------|-----------------------------------------------|-----------|-------|-------|-------|
| Organism Name                     | Size (Mb) | GC%   |                                               | Size (Mb) | GC%   | ANI   | AAI   |
| <i>Anoxybacillus</i> sp. CHMUD    | 2.73      | 41.81 | <i>Anoxybacillus flavithermus</i> NBRC 109594 | 2.77      | 41.70 | 95.03 | 95.81 |
| <i>Anoxybacillus</i> sp. EFIL     | 2.83      | 41.90 | <i>Anoxybacillus ayderensis</i> AB04          | 2.83      | 41.80 | 97.99 | 98.04 |
| <i>Geobacillus</i> sp. BMUD       | 3.46      | 52.02 | <i>Geobacillus vulcani</i> PSS1               | 3.39      | 52.40 | 99.35 | 98.94 |
| <i>Geobacillus</i> sp. MR         | 3.62      | 48.89 | <i>Geobacillus thermodenitrificans</i> OS27   | 3.44      | 49.20 | 99.61 | 99.02 |
| <i>Geobacillus</i> sp. MMMUD3     | 4.69      | 55.27 | <i>Geobacillus icigianus</i> G1w1             | 3.46      | 52.00 | 97.14 | 95.16 |
| <i>Geobacillus</i> sp. DSP4a      | 3.32      | 52.32 | <i>Geobacillus stearothermophilus</i> DSM 458 | 3.47      | 52.10 | 97.64 | 96.84 |
| <i>Parageobacillus</i> sp. NFOSA3 | 3.40      | 42.13 | <i>Geobacillus galactosidasius</i> DSM 18751  | 3.79      | 41.60 | 99.17 | 98.38 |

623

624

625

626

627

628

629

630 **Table 4.** Description names of genes unique to clade I-c.

631

632

| CDS            | Description      | Product                                    | Protein ID     |
|----------------|------------------|--------------------------------------------|----------------|
| N667_RS0109915 | Protein Homology | MFS transporter                            | WP_027409424.1 |
| N667_RS0100490 | Protein Homology | spore coat protein                         | WP_027407730.1 |
| N667_RS0109235 | GeneMarkS-2+     | hypothetical protein                       | WP_027409309.1 |
| N667_RS0101915 | Protein Homology | MurR/RpiR family transcriptional regulator | WP_051529925.1 |
| N667_RS0106250 | N/A*             | hypothetical protein [52]                  | N/A*           |
| N667_RS0109695 | Protein Homology | FUSC family protein                        | WP_027409385.1 |

\*N/A = Not available

633

634

635

636

637

638

639 **Table 5.** Nucleotide sequences of genes unique to clade I-c.

CDS Nucleotide sequence

|                        |                                                                                                                                                                                                                                                                                                                                                                                                                                                                                                                                                                                                                                                                                                                                                                                                                                                                                                                                                                                                                                                                                                                                                                                                                                                                                                                                                                                                                                                                          |
|------------------------|--------------------------------------------------------------------------------------------------------------------------------------------------------------------------------------------------------------------------------------------------------------------------------------------------------------------------------------------------------------------------------------------------------------------------------------------------------------------------------------------------------------------------------------------------------------------------------------------------------------------------------------------------------------------------------------------------------------------------------------------------------------------------------------------------------------------------------------------------------------------------------------------------------------------------------------------------------------------------------------------------------------------------------------------------------------------------------------------------------------------------------------------------------------------------------------------------------------------------------------------------------------------------------------------------------------------------------------------------------------------------------------------------------------------------------------------------------------------------|
| N667_<br>RS010<br>9915 | <p>ATGAAATCTACATTA AAAATTGACTGATGAGGAACTTCAACCTCAAAAAGCTGGTATATTAGATCAGCCTAAAGCGGTGTGGGCGGTAGCGTTTGC GTGTGTTATTTT<br/>           ATTCATGGGATTAGGGCTGGTCGATCCCATCTTCCGGCTATCGCCAGCAAATTAATGCTTCTCCTAGCCAGGTTTCTCTTTTGT TTTTCAAGCTATACGCTGATCAC<br/>           GGGACTCGCTATGTTAATCACTGGATTTGTTTCGAGCAGATTCGGA ACTAAAGGGACTTTATTAGCAGGAACTTTTTTGATTGTTGTATTCTCCGTTCTCGGGGGATT<br/>           ATCAAACAGCATTGAACA ACTTGTGGATTTGAGCGGGTTGGGGACTTGGCAATGCCTTGT TTTATCGCAACGGCTCTGTCTGCCATTGTCGGATTATCCCATGGCG<br/>           GACCAGCCAAAGCGATCATT TTTATATGAAGCTGCCCTCGGCCTAGGGATTTCCGTCGGGCCATTGCTTGGTGGGGAATTAGGCTCTATTTCTGGCGCGGTCCATTT<br/>           TTTGGCGTAGGTGCTCTTATGGCCTTGGCATTCACTTCTATTTTTATTTTGTCTGCCAAAATTACCGAAACCAAAAACAAGAACTTCCCTTGCTGATCCGTTTAAAGCA<br/>           TTGCGTTATCCTGCTCTTTTAAATGTTAGGAATTGTTGCTTTATGTTATAATTTTGGCTTTTTCAC TTTGATGGCATAACACGCCGTTTGT CATGAATTTAAATGAGCATG<br/>           GACTTGGGTTTGT TTTCTTTGGATGGGGGCTTTTTCTAGCCATTACTTCCGCTCTCGTAGCGCCTAAGCTGCAGAGCCGATTGGGAACGATTCTTCAATGTGCGCTA<br/>           TGCTACTGTGCTTTGCTGTTACCCTGCTTGT CATGGGGATTGGACATCCTCGCAAATAACTGTAATTATAGCTGTTGTTGTAGCTGGAGCATCTTAGGTGTGAATA<br/>           ATACATTGATTACGACAGCTGTTATGGTGGCAGCTCCGGTTGAGCGGTCCACGGCTTCAGCGGCCTACAGTTTCATACGGTTTGT TTTTGGGGCAATAGGTCCGTGG<br/>           CTGGCAAGCAAATTAGCTGAATGGTATAATCCGCATGTTCC TTTCTATACCGGTGCACCTGCAGTAACCTTTGGGATTTTGTCTATTTTACTTGGAAGCAAGCACTTG<br/>           CAGCATATAGATCAAGCAGTTTCATCACACCACTAA</p> |
| N667_<br>RS010<br>0490 | <p>ATGGCGCATGGATACCATTATGGAGGGATCTATTTTCAAAAATCGCAATAATAACAGGAACGCTGTTGTACGGCAAAGAGGCACACAGCTGTTGTGCGACCGATCAGG<br/>           AATCTGATGAACTAATTTGGGTGAAAGAATCGTGTAATATTGCCGTACAAA CAACTGATACACAAGCTGCGGTTTTCGCTCCAAGCGGGATTGCAACTAGCGATCGC<br/>           GTTAGTATTAAGCATTATTGTTGGTGATACAGATCGCGGACAGTCGATCGCGCAAGAAATGTTGCAGAGTATTGATACGGAACAAAGCAATAGACAAAAAATTATT<br/>           ATTGACAATTCCAAGGACGTCAACGTAACAACAACAGATACTGATTTGGCAGTGAACGTCCAGGCATTGCTTCAAGTTCTTGTGCAATTGTGCTTAAGCTAGAAG<br/>           TACTATAA</p>                                                                                                                                                                                                                                                                                                                                                                                                                                                                                                                                                                                                                                                                                                                                                                                                                                                                                                                                               |
| N667_<br>RS010<br>9235 | <p>ATGCAAAAACAAACACCCGTCTATACAAGATGCATTCATTA AAAAGCGAAGCAAGTTACTTCAAATACTTT CAGTCCTTCTGCCAATATATTATTAATTATTTTTTTCT<br/>           CTGTCTTATTGTCACTCTTCTCAGCAGGAGCAGCTTCTTGGCTGAGAGGTATCTCCTTCAGTCCTTAATGTTAATGGAGAAAGTTCATATGCATCTTTACTTTCTGTCGC<br/>           ATTCTTTTGGGACA ACTAGGCTTTTTAGAAAAAGAAGCAAAGTGTTATGATCAAAGGAATAAAAATTGCCATACTTTAAGGTATTTAATGAATATCATTTCGTCAACA<br/>           TCAATTTTTGAAAGAGGAACATAAACATCTTTGTAAAAAAATTACATCTCAAATACTGACTTACTACTCATCTGAAGGGAATATTAGAATTATAATAGATGCCCCGT<br/>           TGGTTCCACCATGGAAACCGGAATCTCAATCACTCTCTTAA</p>                                                                                                                                                                                                                                                                                                                                                                                                                                                                                                                                                                                                                                                                                                                                                                                                                                                                                                    |



N667\_ RS010 1915  
GTGTTGAAAGGGGGTAAATTAGTATTCAGGAGTCGCTTGATTGTTAAAACCGTCTGAAAGGAAAGCTGCGGAGTATATTTAAAGCATCCTGATGAAGTTGTAA  
AACTGTGCGATTCAAAAAGCTGTCGCAGCGAACCAATGTCAGCGAAGCCACGATTATTCGCTTGTGCGGACGATAAATTGTAAGGTTTTCAAGAAGTGAAGCTGCG  
GATTGCCGGGACCTTGCCAATCGGAACGAACAGAACCAGTCCTACCAAGAAGTGCCGATAAACGGTCCGTTGATTTCGGTCATCACATCGGTATCGAACAACAAT  
ATTCAATCCATTAGGATACGTTATCGGTGTTATCAAAGGATGAAGTGGAAAAAGCAATTCGCACTTAAGTAAAGCGCGCAAGATTGCGGTTTACGGAATTGGTG  
CTTCGGCATTGATCGCGCAAGATTTTAAAGCAAAAATTGACAAGGATTAACCGTTGGTGGCAAAACAGGATTTGATTATGATACACAAGGAATGATCAGTGCCAACCT  
GACAAAGGATGACGTTGCTTTTGGGATTTCTACTCCGGTCAAACAGAAGATATTATTCGTTCTTTAACATTGGCGAAGGAAAAACGGAGCGACGATTATTTCTTTAA  
CAAAATTCGGATCCAACCCGTTTCTGAGCTTGCTGATATTTGTTATATACGAGCTCGTTAGAAAAAGCATTTCGCAGCGGAGCGATGAGTTCGCGAATTGCCAG  
CTCAATGTTATCGATATTCTATACGTTGGCATGATGAGCCAAAATTATGATGAAAGTATTGCTGCTTTAGAACGAACAAGAGAAGCAGTAAAAATGTCCAAACGGA  
ATGATGGCATGTAA

N667\_ RS010 6250  
ATGTGGGGGCTTACAATCGCGATCATTCTCTTAACTCCATTGCCTTTGTAACAAAATCGGCGCTTAACGAAAAGCCAAAATTGTGCACATTTGGACCTTTACTATTTGT  
TTACAGGGGATTGTGATCTGTATTTAGGTTTGAATATGAGGCATATTGGTACTTTACAAATGGAATGGAGGGAATATCGATACCAGCTCGCACCCCTGCTGATCCC  
TCCTGTAAATATGATGTTTTTGAATTGGTATCCTTTGAGCGCCCCATGGTTCCGACGTTTTGTTACGTTATGTGTTGGACTATATTTATAACGGCGTACGAAGCCGC  
CACGTTGCTACCTGAACCTTGGGGTATTTCCGCTACGGATGGTGAATTTATGGTATTCGATACTATCATATCCATTGTTGCTGTAATTGACTCCGTTATTACAA  
GTGGATTAATAAATTGAAAAAGAGAATTAA

N667\_ RS010 9695  
ATGAAAAACAACAAAAGAACACAACGATTTGCTCTCATAAAAGGAATCGCACTTATTGCAAAAATGGCTTTAGCTTCCGGGCTCGCATGGAACTGGCCAAAATTC  
TAGGATCCAAGCACCCCTATTTAGCACCCCTAACAGTTATTCTGTCGATGCAGGAAACCGTAATATATTCGGCTACATACGCGCTTTATAGAATCATTGGCACCGTT  
TTTGGCGTTGCTGTGACGTTTTTTATTGTCAGCCATTACAGGTAACGGTTGGACCATCGGCGGGCTGCTATTTGGCGGAATGCTGATTCCCGTGATATTTAGAGTA  
CATAAACGATTATCCACCAAGTCGCATTGACCATCTTATTAGTGTGTTGCTTTGCCATAAAAACAAGCGATTATTCCTTTGATCGAATTCGTGACACGATCGTGGG  
GGCCATTACCGTCTTTTCGTTTATGATCCTTTTCCGCCTAACACTACGTGAAAGAAGCGCGTCAAAACATTAAATCAATTTGGATTTCATCTTGTTCAGCTGTTTAA  
AAGAACAGCTTACTGGGTAGAGCATAAAGTCTGCTCTAGAGGGCCAAGAATAAAGAAGGATGTTACCAACTTGCTTCAAGAATTGCACCAAGTACAAAAAGA  
TTTGCAACTGGCAAAAAAGAGCCTCAAATTCATTTTCCAAAAATAAACAACAATACTACTACAACAATACGAACAATTTCTCGCGCAGCTGACGACAGGATAC  
ATGTATATTTCCGACGTGTTAACACGTTCAAGGATTGGGCAAAAAACAGAGACGATGTCAACAATACTGAGCAACAGCAATGGGCTGCTCAATTACAAATGCTAGGA  
GCCTATATTGAAAAACGGCTCCATCAAAAAGTAAAAAGAACAGCCATATTCAGAAGCTTTGAAGCTTACACCTGACTTACTTATTGATTTATCTTCCATTTACGCACAAAT  
GATGGTTCCGACAGAACTGAAAGAGCATAGATATGCATTAAGCTTGTATCATCAGACGCTTCAGTTTATTCAGGAACTAAAAACAGCACAGCAGTAA

---

640

641

642

643

644 **Table 6.** Results of BLASTn alignment of 6 CDS unique to clade I-c against genomes of clade I-c.

| CDS            | subject accession | subject title                                     | % identity | evalue    | bitscore | % Overlap* |
|----------------|-------------------|---------------------------------------------------|------------|-----------|----------|------------|
| N667_RS0109915 | NZ_JHVN01000010.1 | <i>Anoxybacillus tepidamans</i> PS2 N667          | 100.0      | 0         | 2255     | 1.00       |
| N667_RS0109915 | NZ_NASY01000037.1 | <i>Anoxybacillus</i> sp. UARK-01 Contig37         | 77.3       | 1.97E-177 | 621      | 0.87       |
| N667_RS0109915 | NZ_LPUG01000023.1 | <i>Anoxybacillus</i> sp. P3H1B AT864_contig000023 | 77.2       | 9.17E-176 | 616      | 0.87       |
| N667_RS0109915 | NZ_CP015435.1     | <i>Anoxybacillus</i> sp. B2M1                     | 76.9       | 9.23E-171 | 599      | 0.87       |
| N667_RS0109915 | NZ_CP015436.1     | <i>Anoxybacillus</i> sp. B7M1                     | 76.9       | 9.23E-171 | 599      | 0.88       |
| N667_RS0109695 | NZ_JHVN01000010.1 | <i>Anoxybacillus tepidamans</i> PS2 N667          | 100.0      | 0         | 1951     | 1.00       |
| N667_RS0109695 | NZ_NASY01000037.1 | <i>Anoxybacillus</i> sp. UARK-01 Contig37         | 73.9       | 4.12E-94  | 344      | 0.84       |
| N667_RS0109695 | NZ_CP015436.1     | <i>Anoxybacillus</i> sp. B7M1                     | 73.6       | 4.15E-89  | 327      | 0.84       |
| N667_RS0109695 | NZ_CP015435.1     | <i>Anoxybacillus</i> sp. B2M1                     | 73.6       | 4.15E-89  | 327      | 0.84       |
| N667_RS0109695 | NZ_LPUG01000023.1 | <i>Anoxybacillus</i> sp. P3H1B AT864_contig000023 | 72.7       | 1.15E-89  | 329      | 1.00       |
| N667_RS0109235 | NZ_JHVN01000009.1 | <i>Anoxybacillus tepidamans</i> PS2 N667          | 100.0      | 0         | 870      | 1.00       |
| N667_RS0109235 | NZ_CP015435.1     | <i>Anoxybacillus</i> sp. B2M1                     | 77.8       | 1.57E-05  | 49.1     | 0.17       |
| N667_RS0109235 | NZ_NASY01000046.1 | <i>Anoxybacillus</i> sp. UARK-01 Contig46         | 76.2       | 3.37E-07  | 54.7     | 0.22       |
| N667_RS0109235 | NZ_LPUG01000025.1 | <i>Anoxybacillus</i> sp. P3H1B AT864_contig000025 | 76.2       | 3.37E-07  | 54.7     | 0.22       |
| N667_RS0109235 | NZ_CP015436.1     | <i>Anoxybacillus</i> sp. B7M1                     | 75.2       | 1.57E-05  | 49.1     | 0.22       |
| N667_RS0106250 | NZ_JHVN01000004.1 | <i>Anoxybacillus tepidamans</i> PS2 N667          | 100.0      | 0         | 854      | 1.00       |
| N667_RS0106250 | NZ_NASY01000026.1 | <i>Anoxybacillus</i> sp. UARK-01 Contig26         | 87.2       | 1.99E-04  | 45.4     | 0.08       |
| N667_RS0106250 | NZ_CP015435.1     | <i>Anoxybacillus</i> sp. B2M1                     | 86.2       | 5.6       | 30.7     | 0.06       |
| N667_RS0106250 | NZ_NASY01000047.1 | <i>Anoxybacillus</i> sp. UARK-01 Contig47         | 86.2       | 5.6       | 30.7     | 0.06       |
| N667_RS0106250 | NZ_LPUG01000009.1 | <i>Anoxybacillus</i> sp. P3H1B AT864_contig000009 | 86.2       | 5.6       | 30.7     | 0.06       |
| N667_RS0106250 | NZ_LPUG01000010.1 | <i>Anoxybacillus</i> sp. P3H1B AT864_contig000010 | 85.7       | 1.99E-04  | 45.4     | 0.09       |
| N667_RS0106250 | NZ_CP015436.1     | <i>Anoxybacillus</i> sp. B7M1                     | 80.4       | 0.12      | 36.2     | 0.10       |
| N667_RS0101915 | NZ_JHVN01000001.1 | <i>Anoxybacillus tepidamans</i> PS2 N667          | 100.0      | 0         | 1596     | 1.00       |
| N667_RS0101915 | NZ_NASY01000051.1 | <i>Anoxybacillus</i> sp. UARK-01 Contig51         | 76.8       | 8.87E-130 | 462      | 0.97       |
| N667_RS0101915 | NZ_LPUG01000011.1 | <i>Anoxybacillus</i> sp. P3H1B AT864_contig000011 | 76.5       | 1.92E-126 | 451      | 0.97       |

|                |                   |                                                   |       |           |      |      |
|----------------|-------------------|---------------------------------------------------|-------|-----------|------|------|
| N667_RS0101915 | NZ_CP015435.1     | <i>Anoxybacillus</i> sp. B2M1                     | 76.2  | 1.50E-122 | 438  | 0.96 |
| N667_RS0101915 | NZ_CP015436.1     | <i>Anoxybacillus</i> sp. B7M1                     | 76.2  | 1.50E-122 | 438  | 0.97 |
| N667_RS0100490 | NZ_JHVN01000001.1 | <i>Anoxybacillus tepidamans</i> PS2 N667          | 100.0 | 0         | 798  | 1.00 |
| N667_RS0100490 | NZ_NASY01000011.1 | <i>Anoxybacillus</i> sp. UARK-01 Contig11         | 89.3  | 0.11      | 36.2 | 0.06 |
| N667_RS0100490 | NZ_CP015436.1     | <i>Anoxybacillus</i> sp. B7M1                     | 89.3  | 0.11      | 36.2 | 0.06 |
| N667_RS0100490 | NZ_CP015435.1     | <i>Anoxybacillus</i> sp. B2M1                     | 89.3  | 0.11      | 36.2 | 0.06 |
| N667_RS0100490 | NZ_LPUG01000013.1 | <i>Anoxybacillus</i> sp. P3H1B AT864_contig000013 | 89.3  | 0.11      | 36.2 | 0.06 |

\*Calculated dividing length of query by the minimum of either subject length or query length.

645

646

647

648

649

650

651

652

653 **Table 7.** Results of BLASTn alignment of 6 CDS unique to clade I-c against the RefSeq database showing the best hit to genomes outside of clade

654 I-c.

| CDS            | subject accession | subject title                                       | % identity | evaluate | bitscore | Overlap* |
|----------------|-------------------|-----------------------------------------------------|------------|----------|----------|----------|
| N667_RS0109915 | NZ_ADWW01000002.1 | <i>Bacillus methanolicus</i> MGA3 contig_2          | 77.0       | 0        | 699      | 1.00     |
| N667_RS0109695 | NZ_NTTM01000047.1 | <i>Bacillus</i> sp. AFS018417                       | 74.6       | 2.61E-92 | 353      | 0.77     |
| N667_RS0109235 | NZ_JPDI01000001.1 | <i>Polaribacter</i> sp. Hel1_33_49 PHEL49a          | 81.5       | 2.1      | 47.3     | 0.14     |
| N667_RS0106250 | NZ_LMEO01000030.1 | <i>Paenibacillus</i> sp. Root444D2 contig_36        | 86.4       | 3.42E-08 | 73.1     | 0.14     |
| N667_RS0101915 | NZ_JYCE01000070.1 | <i>Bacillus alveayuensis</i> strain 24KAM51         | 94.0       | 0        | 1280     | 0.98     |
| N667_RS0100490 | NZ_FVZC01000008.1 | <i>Mesobacillus jeotgali</i> strain Marseille-P1092 | 76.4       | 1.82E-40 | 180      | 0.78     |

\*Calculated dividing length of query by the minimum of either subject length or query length.

655

656

657

Tree scale: 0.1

0 4.7 55.3

**Genome characteristics**

- Genome size (Mb)
- GC content (%)

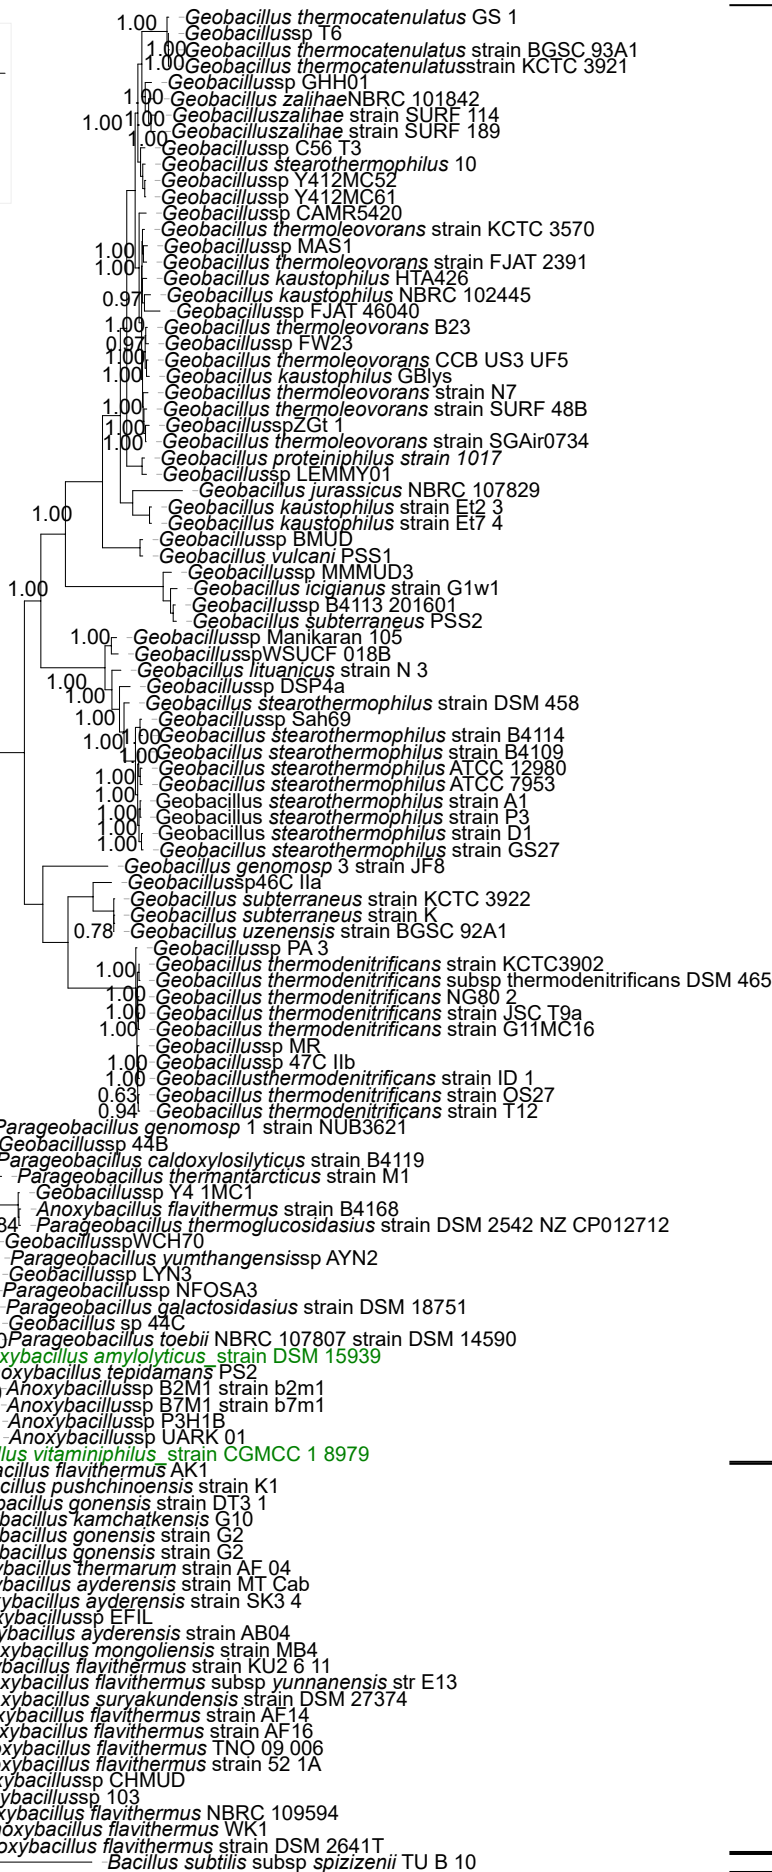

I-a

I-b

I-c

II

outgroup

**Figure 2**

Tree scale: 0.01

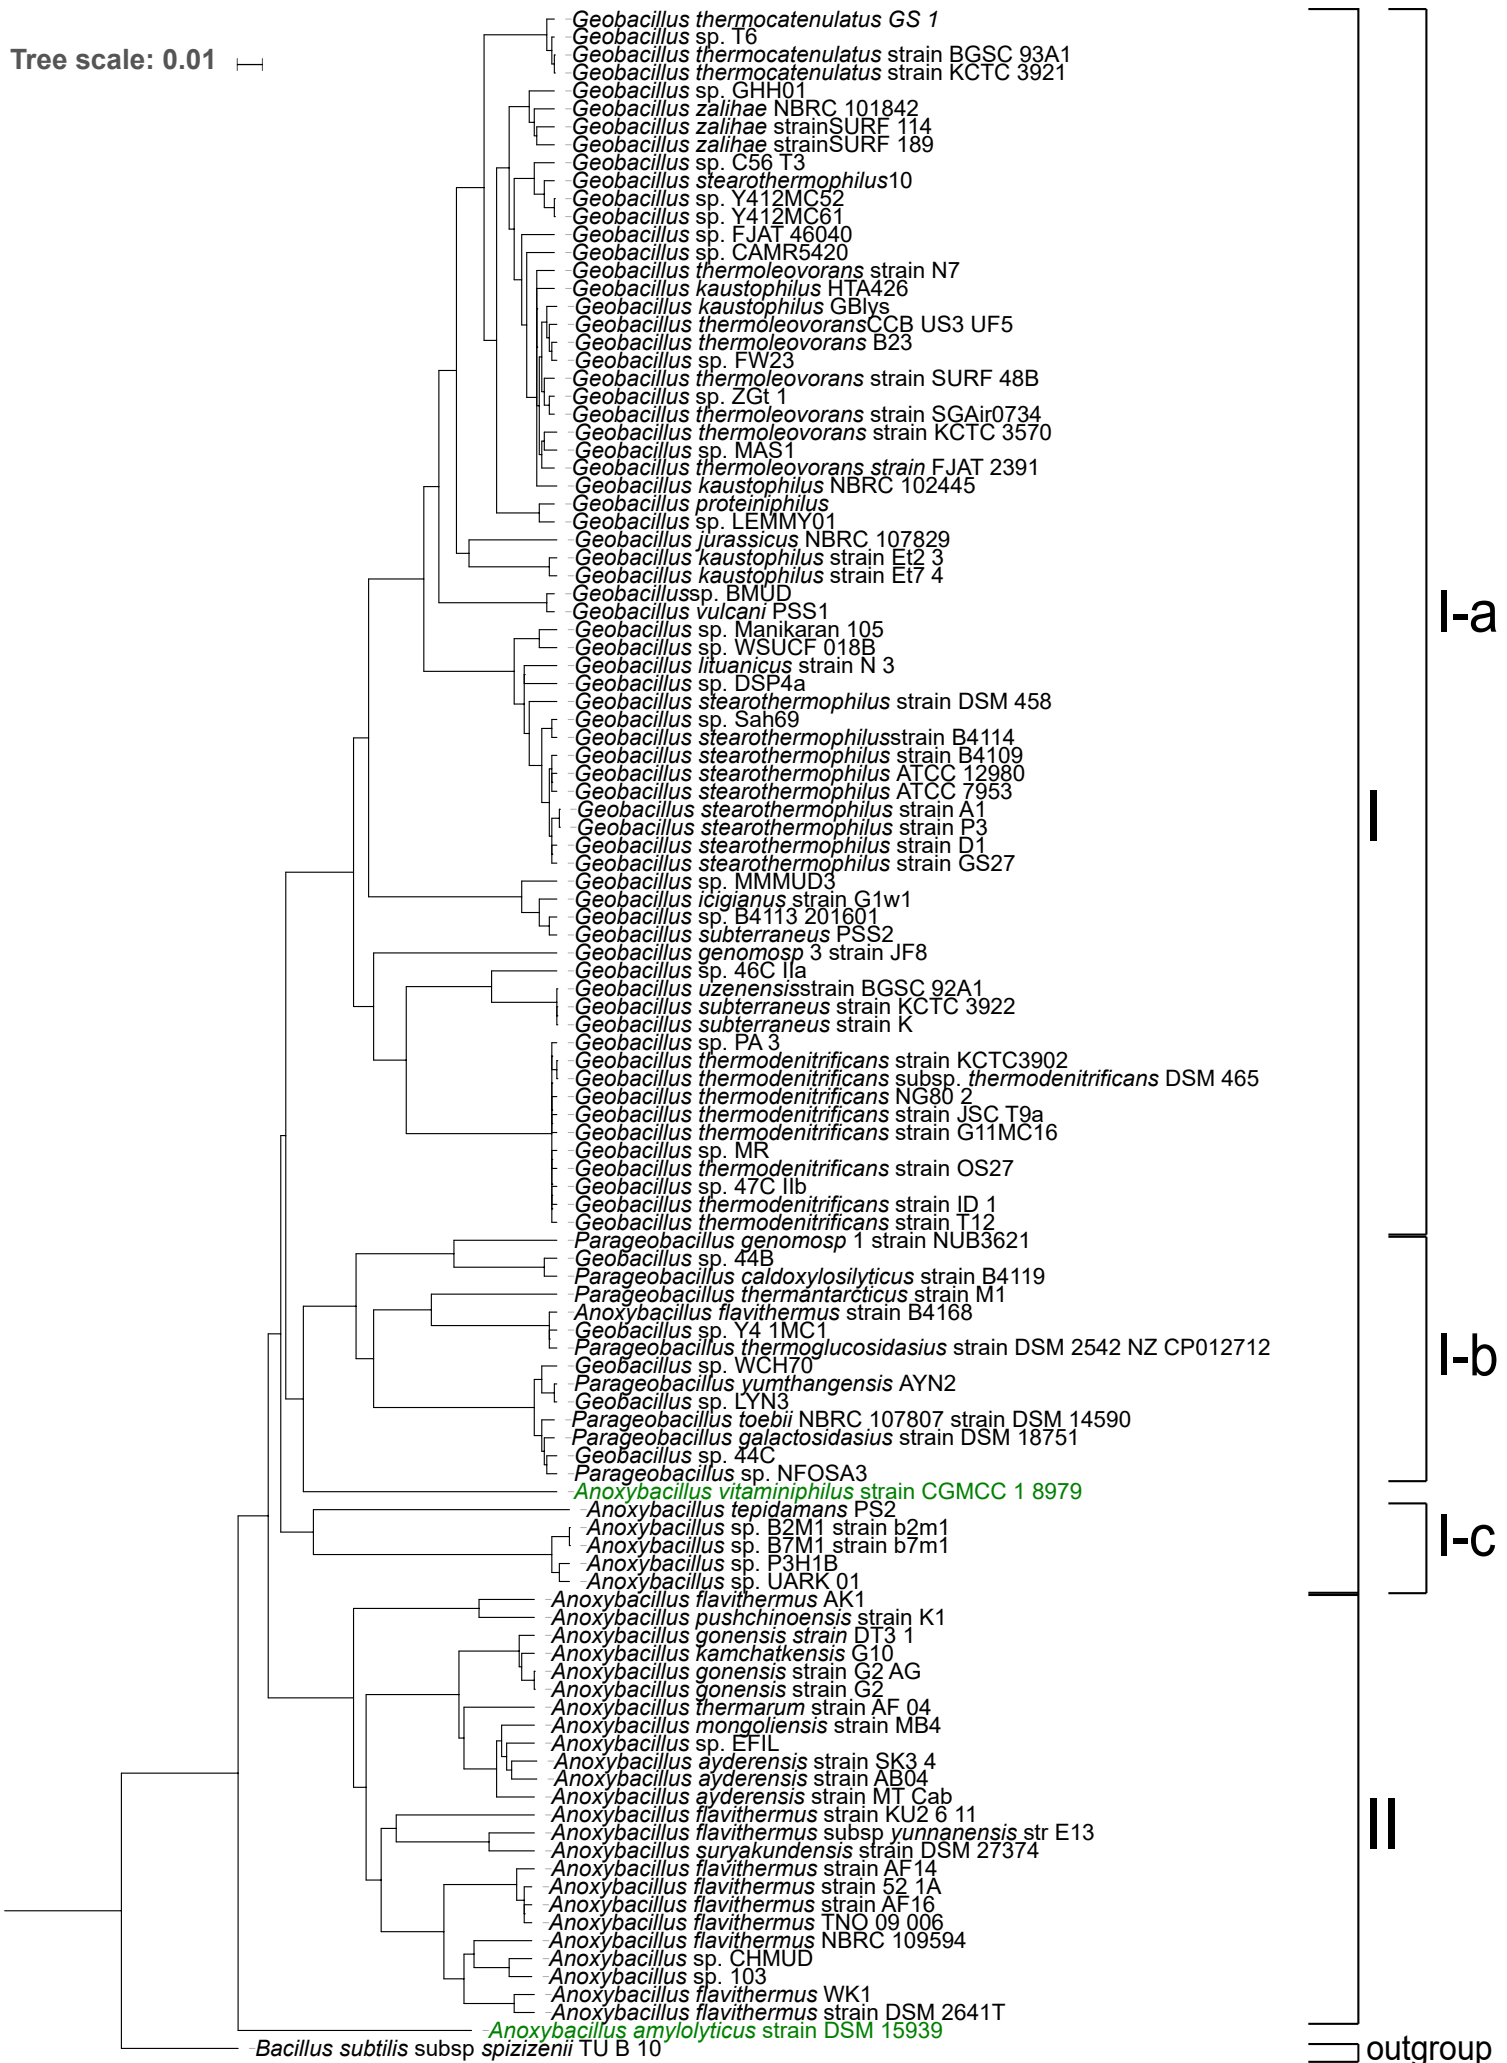

**Figure 3**

Tree scale: 0.01

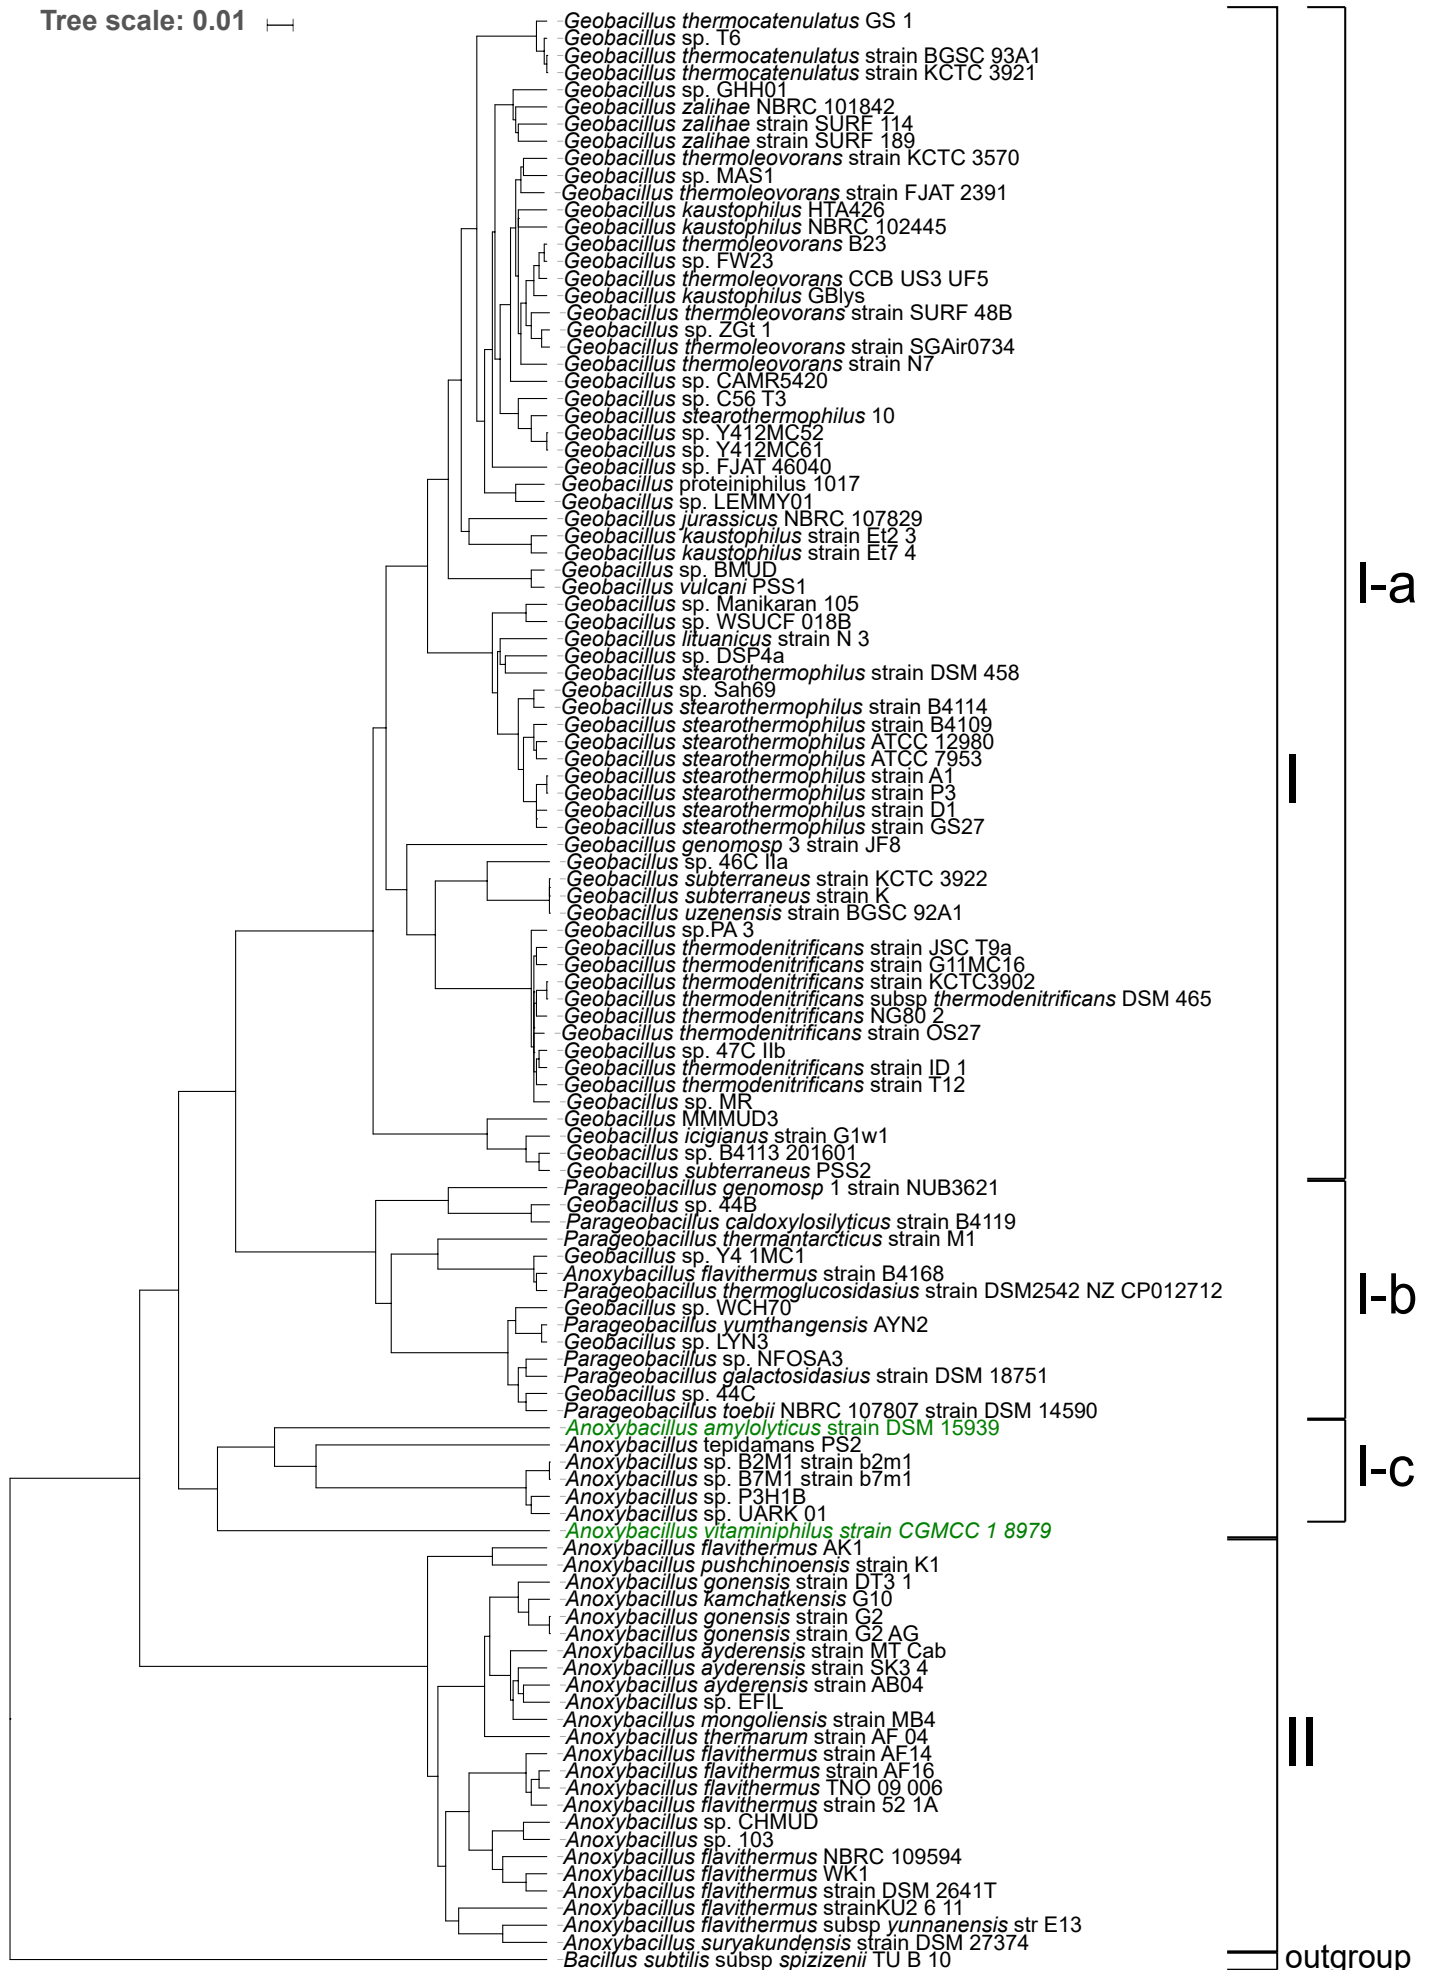

Figure 4

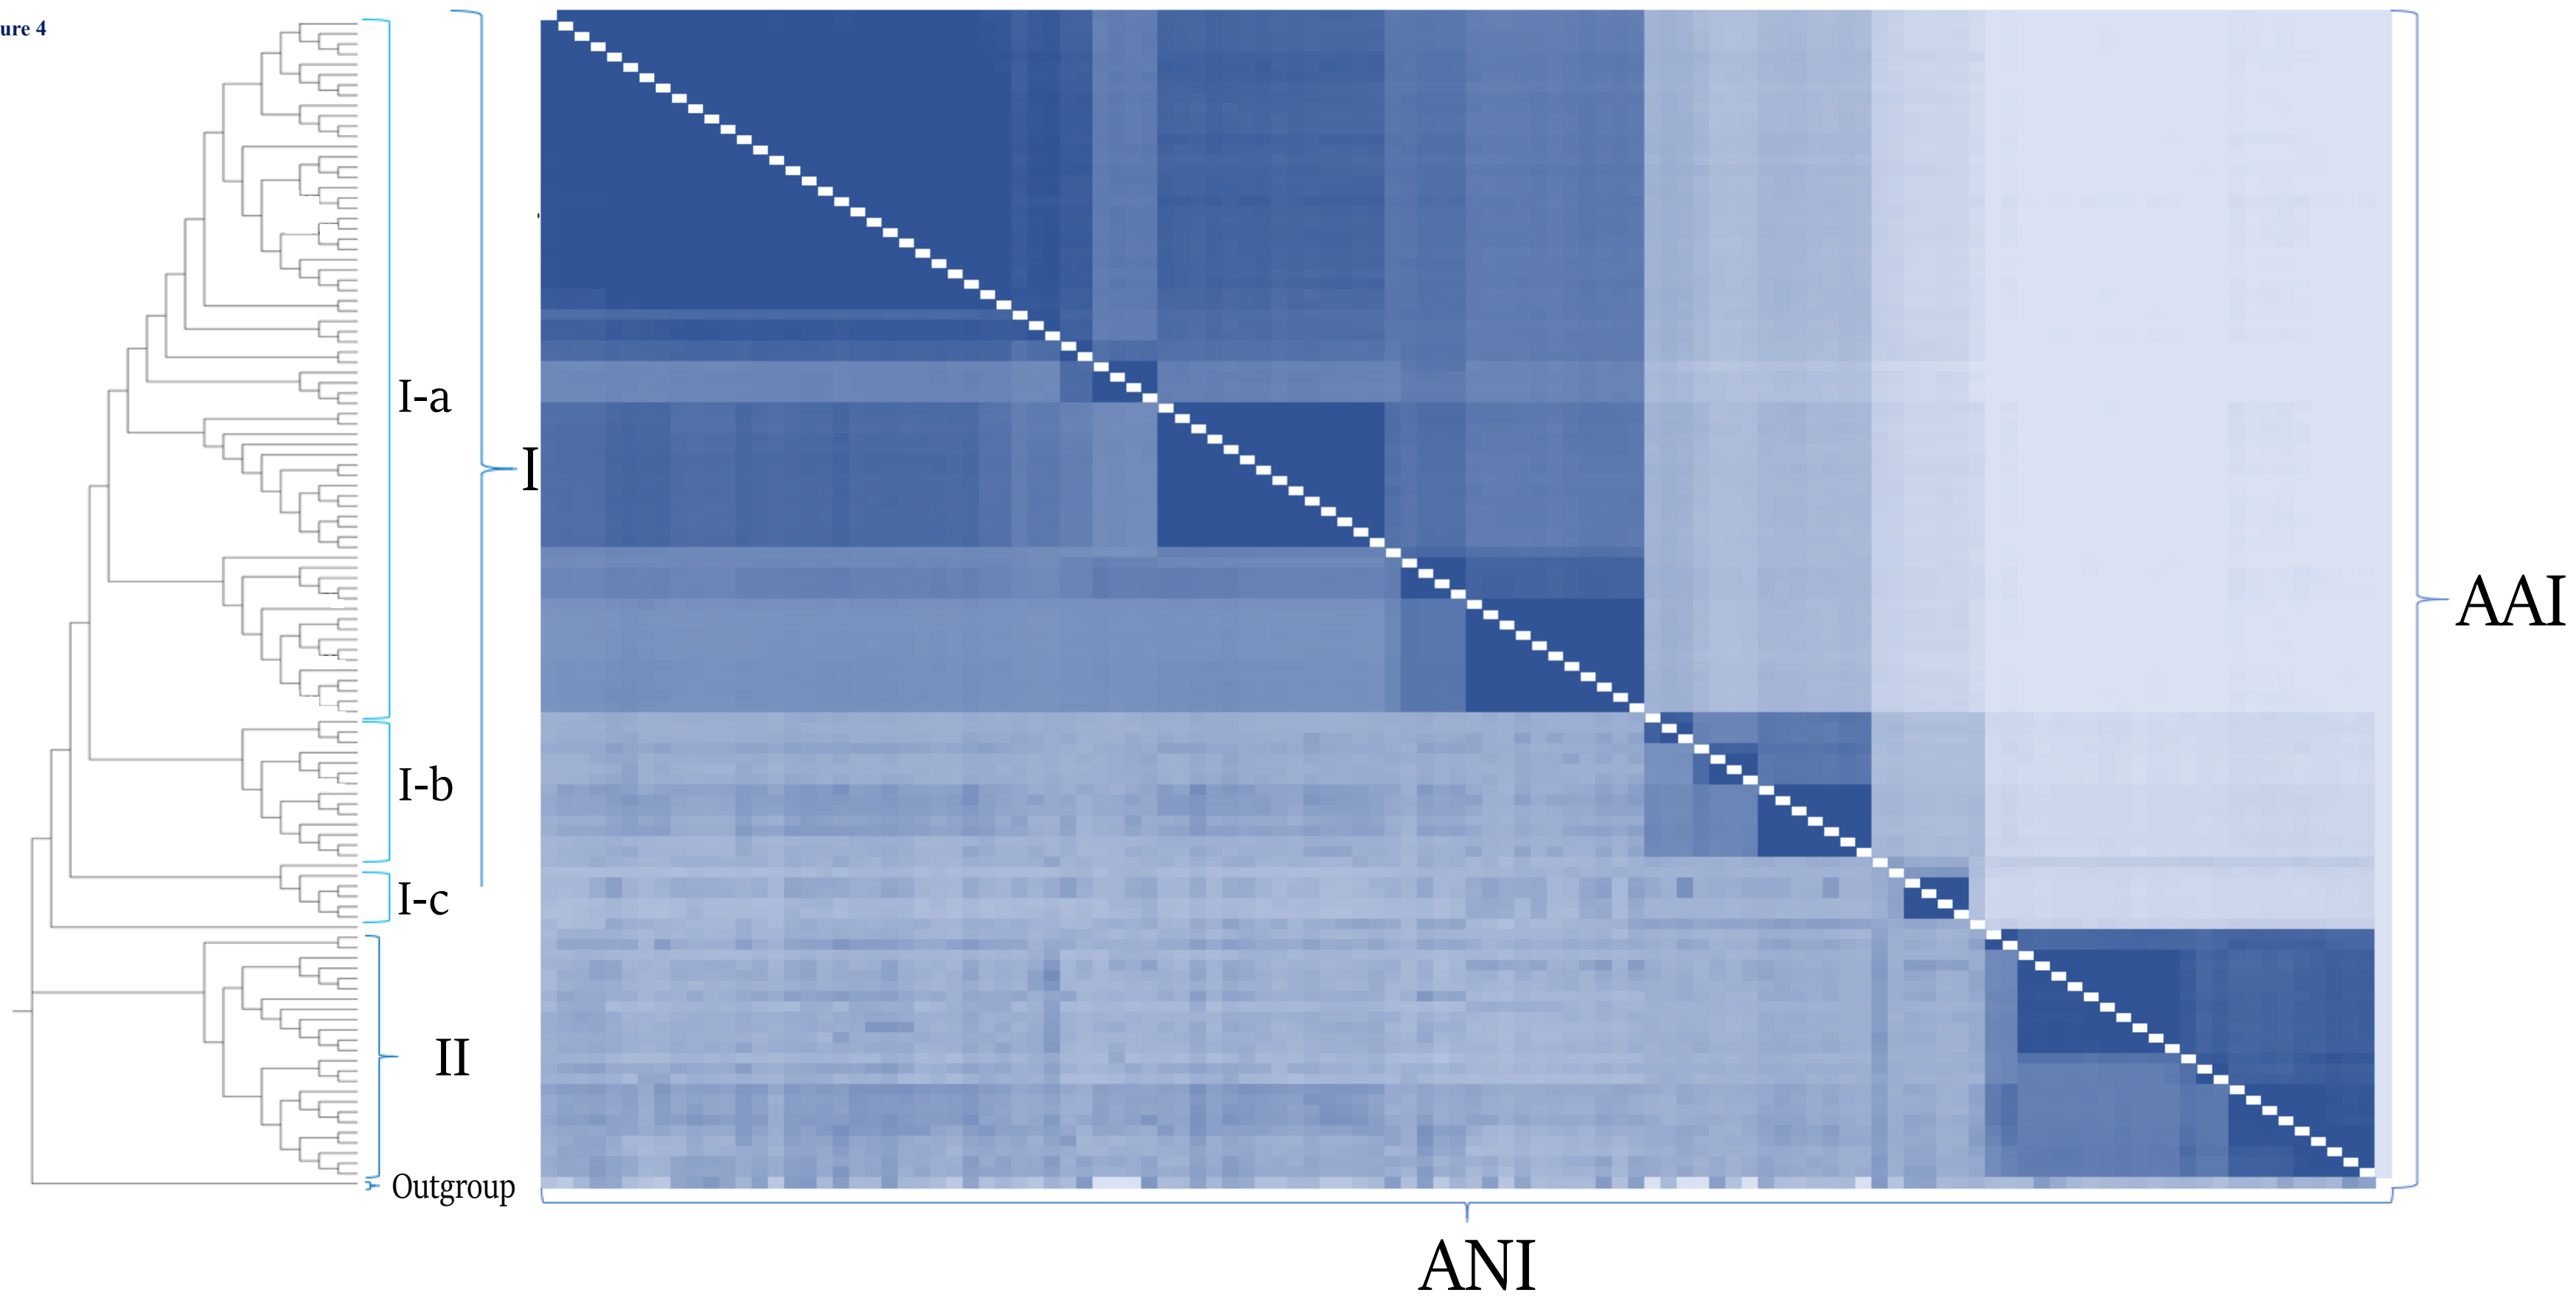

Source: https://www.biorxiv.org/content/10.1101/2021.06.18.449068v1.full.pdf
